# Supplementary material for: Quantitative Ubiquitinomics Revealed Abnormal Ubiquitinated ATP7A Involved in Down-Regulation of ACTH in Silent Corticotroph Adenomas
Source: Front Endocrinol (Lausanne). 2022 May 11;13:863017. doi: 10.3389/fendo.2022.863017 (PMC9130458; doi:10.3389/fendo.2022.863017)
Supplement: Supplementary file 1 [file Table_1.xls]

## Sheet: Sheet1
Protein accession	Position	Amino acid	S/F Ratio	S/F P value	Regulated Type	Protein description	Gene name	Localization probability	PEP	Score	Charge	Modified sequence	Mass error [ppm]	F1	F2	F3	F4	F5	S1	S2	S3	S4	S5	Subcellular localization	KEGG KO No.	KEGG Gene	KEGG pathway	Biological Process	Cellular Component	Molecular Function	Pfam ID	Domain description	KOG category	KOG NO.	KOG description
O00410	556	K	0.648	0.034287	Down	Importin-5 OS=Homo sapiens OX=9606 GN=IPO5 PE=1 SV=4	IPO5	1	1.31513e-69	229.17	2	GK(1)TIECISLIGLAVGK	-3.5266	1.434	0.863	1.65	0.882	1.41	0.632	1.026	0.884	0.653	0.846	cytoplasm	K20222			GO:0000079 regulation of cyclin-dependent protein serine/threonine kinase activity; GO:0001101 response to acid chemical; GO:0001932 regulation of protein phosphorylation; GO:0001933 negative regulation of protein phosphorylation; GO:0006469 negative regulation of protein kinase activity; GO:0006606 protein import into nucleus; GO:0006607 NLS-bearing protein import into nucleus; GO:0006610 riboso…	GO:0005622 intracellular; GO:0005623 cell; GO:0005634 nucleus; GO:0005635 nuclear envelope; GO:0005643 nuclear pore; GO:0005730 nucleolus; GO:0005737 cytoplasm; GO:0012505 endomembrane system; GO:0016020 membrane; GO:0031090 organelle membrane; GO:0031965 nuclear membrane; GO:0031967 organelle envelope; GO:0031974 membrane-enclosed lumen; GO:0031975 envelope; GO:0031981 nuclear lumen; GO:0032991 …	GO:0004857 enzyme inhibitor activity; GO:0005048 signal sequence binding; GO:0005095 GTPase inhibitor activity; GO:0005215 transporter activity; GO:0005488 binding; GO:0005515 protein binding; GO:0008139 nuclear localization sequence binding; GO:0008536 Ran GTPase binding; GO:0017016 Ras GTPase binding; GO:0019899 enzyme binding; GO:0030234 enzyme regulator activity; GO:0030695 GTPase regulator a…			UY	KOG2171	Karyopherin (importin) beta 3
O00445	62	K	2.096	0.0445725	Up	Synaptotagmin-5 OS=Homo sapiens OX=9606 GN=SYT5 PE=1 SV=2	SYT5	1	4.45285e-83	306.06	2	K(1)SQAQAQVHLQEVK	-3.214	2.15	0.546	0.938	1.093	0.704		1.682	2.828	2.32		cytoplasm	K19905			GO:0001505 regulation of neurotransmitter levels; GO:0006810 transport; GO:0006836 neurotransmitter transport; GO:0006887 exocytosis; GO:0006897 endocytosis; GO:0006906 vesicle fusion; GO:0006996 organelle organization; GO:0007154 cell communication; GO:0007267 cell-cell signaling; GO:0007268 chemical synaptic transmission; GO:0007269 neurotransmitter secretion; GO:0009987 cellular process; GO:00…	GO:0005622 intracellular; GO:0005623 cell; GO:0005737 cytoplasm; GO:0005886 plasma membrane; GO:0008021 synaptic vesicle; GO:0012505 endomembrane system; GO:0012506 vesicle membrane; GO:0016020 membrane; GO:0030133 transport vesicle; GO:0030141 secretory granule; GO:0030658 transport vesicle membrane; GO:0030659 cytoplasmic vesicle membrane; GO:0030672 synaptic vesicle membrane; GO:0031045 dense …	GO:0000149 SNARE binding; GO:0001786 phosphatidylserine binding; GO:0005488 binding; GO:0005509 calcium ion binding; GO:0005515 protein binding; GO:0005543 phospholipid binding; GO:0005544 calcium-dependent phospholipid binding; GO:0005546 phosphatidylinositol-4,5-bisphosphate binding; GO:0008289 lipid binding; GO:0019905 syntaxin binding; GO:0030276 clathrin binding; GO:0035091 phosphatidylinosi…	PF00168	C2 domain	U	KOG1028	Ca2+-dependent phospholipid-binding protein Synaptotagmin, required for synaptic vesicle and secretory granule exocytosis
O00560	185	K	0.351	0.0016321	Down	Syntenin-1 OS=Homo sapiens OX=9606 GN=SDCBP PE=1 SV=1	SDCBP	1	6.73989e-07	154.66	2	QAFGEK(1)ITMTIR	1.1122	1.762	0.8	1.252	1.516	1.295		0.306	0.405	0.448	0.702	cytoskeleton	K17254			GO:0001558 regulation of cell growth; GO:0001775 cell activation; GO:0001932 regulation of protein phosphorylation; GO:0001934 positive regulation of protein phosphorylation; GO:0002090 regulation of receptor internalization; GO:0002091 negative regulation of receptor internalization; GO:0002252 immune effector process; GO:0002263 cell activation involved in immune response; GO:0002274 myeloid le…	GO:0000323 lytic vacuole; GO:0005576 extracellular region; GO:0005615 extracellular space; GO:0005622 intracellular; GO:0005623 cell; GO:0005634 nucleus; GO:0005635 nuclear envelope; GO:0005654 nucleoplasm; GO:0005737 cytoplasm; GO:0005764 lysosome; GO:0005766 primary lysosome; GO:0005773 vacuole; GO:0005775 vacuolar lumen; GO:0005829 cytosol; GO:0005856 cytoskeleton; GO:0005886 plasma membrane; …	GO:0001664 G protein-coupled receptor binding; GO:0005102 signaling receptor binding; GO:0005109 frizzled binding; GO:0005126 cytokine receptor binding; GO:0005137 interleukin-5 receptor binding; GO:0005488 binding; GO:0005515 protein binding; GO:0005543 phospholipid binding; GO:0005546 phosphatidylinositol-4,5-bisphosphate binding; GO:0008022 protein C-terminus binding; GO:0008092 cytoskeletal p…	PF00595	PDZ domain (Also known as DHR or GLGF)	T	KOG0849	Transcription factor PRD and related proteins, contain PAX and HOX domains
O14683	43	K	0.154	0.0356144	Down	Tumor protein p53-inducible protein 11 OS=Homo sapiens OX=9606 GN=TP53I11 PE=1 SV=2	TP53I11	1	5.46415e-07	165.09	2	SK(1)ISQVLGNEIK	-0.012212			3.51	2.282	1.3		0.532			0.198	plasma membrane				GO:0008285 negative regulation of cell population proliferation; GO:0042127 regulation of cell population proliferation; GO:0048519 negative regulation of biological process; GO:0048523 negative regulation of cellular process; GO:0050789 regulation of biological process; GO:0050794 regulation of cellular process; GO:0065007 biological regulation;
O14929	15	K	2.05	0.0370472	Up	Histone acetyltransferase type B catalytic subunit OS=Homo sapiens OX=9606 GN=HAT1 PE=1 SV=1	HAT1	0.999993	0.000585547	99.174	2	FLVEYK(1)SAVEK	-3.0597			0.758	1.012	0.499		1.602	1.2	1.849		cytoplasm	K11303	HAT1; histone acetyltransferase 1 [EC:2.3.1.48]	hsa04613 Neutrophil extracellular trap formation; hsa05034 Alcoholism	GO:0006323 DNA packaging; GO:0006325 chromatin organization; GO:0006333 chromatin assembly or disassembly; GO:0006334 nucleosome assembly; GO:0006335 DNA replication-dependent nucleosome assembly; GO:0006336 DNA replication-independent nucleosome assembly; GO:0006464 cellular protein modification process; GO:0006473 protein acetylation; GO:0006475 internal protein amino acid acetylation; GO:00068…	GO:0000228 nuclear chromosome; GO:0000785 chromatin; GO:0000790 nuclear chromatin; GO:0005622 intracellular; GO:0005623 cell; GO:0005634 nucleus; GO:0005654 nucleoplasm; GO:0005694 chromosome; GO:0005737 cytoplasm; GO:0016363 nuclear matrix; GO:0031974 membrane-enclosed lumen; GO:0031981 nuclear lumen; GO:0032991 protein-containing complex; GO:0034399 nuclear periphery; GO:0043226 organelle; GO:0…	GO:0003824 catalytic activity; GO:0004402 histone acetyltransferase activity; GO:0005488 binding; GO:0005515 protein binding; GO:0008080 N-acetyltransferase activity; GO:0010485 H4 histone acetyltransferase activity; GO:0016407 acetyltransferase activity; GO:0016410 N-acyltransferase activity; GO:0016740 transferase activity; GO:0016746 transferase activity, transferring acyl groups; GO:0016747 t…	PF10394	Histone acetyl transferase HAT1 N-terminus	B	KOG2696	Histone acetyltransferase type b catalytic subunit
O14975	419	K	0.342	0.0273756	Down	Very long-chain acyl-CoA synthetase OS=Homo sapiens OX=9606 GN=SLC27A2 PE=1 SV=2	SLC27A2	1	9.4961e-05	78.043	2	VPK(1)GEVGLLVCK	-0.5369			0.601		0.848	0.26				0.236	endoplasmic reticulum	K08746	SLC27A2; solute carrier family 27 (fatty acid transporter), member 2 [EC:6.2.1.- 6.2.1.3]	hsa03320 PPAR signaling pathway; hsa04146 Peroxisome; hsa04931 Insulin resistance	GO:0001561 fatty acid alpha-oxidation; GO:0001676 long-chain fatty acid metabolic process; GO:0001775 cell activation; GO:0002252 immune effector process; GO:0002263 cell activation involved in immune response; GO:0002274 myeloid leukocyte activation; GO:0002275 myeloid cell activation involved in immune response; GO:0002283 neutrophil activation involved in immune response; GO:0002366 leukocyte …	GO:0005622 intracellular; GO:0005623 cell; GO:0005737 cytoplasm; GO:0005777 peroxisome; GO:0005778 peroxisomal membrane; GO:0005779 integral component of peroxisomal membrane; GO:0005783 endoplasmic reticulum; GO:0005788 endoplasmic reticulum lumen; GO:0005789 endoplasmic reticulum membrane; GO:0005829 cytosol; GO:0005886 plasma membrane; GO:0012505 endomembrane system; GO:0012506 vesicle membran…	GO:0003824 catalytic activity; GO:0004467 long-chain fatty acid-CoA ligase activity; GO:0005102 signaling receptor binding; GO:0005488 binding; GO:0005515 protein binding; GO:0015645 fatty acid ligase activity; GO:0016405 CoA-ligase activity; GO:0016874 ligase activity; GO:0016877 ligase activity, forming carbon-sulfur bonds; GO:0016878 acid-thiol ligase activity; GO:0019899 enzyme binding; GO:00…	PF13193	Domain of unknown function (DUF4009)	I	KOG1179	Very long-chain acyl-CoA synthetase/fatty acid transporter
O15162	223	K	0.586	0.0251605	Down	Phospholipid scramblase 1 OS=Homo sapiens OX=9606 GN=PLSCR1 PE=1 SV=1	PLSCR1	1	7.30638e-08	190.93	2	FTIQNEK(1)R	0.30641	1.482	1.931	1.445	0.968	1.281	0.745	1.072	1.031	0.897	0.42	cytoplasm				GO:0001775 cell activation; GO:0002252 immune effector process; GO:0002376 immune system process; GO:0002526 acute inflammatory response; GO:0002682 regulation of immune system process; GO:0002684 positive regulation of immune system process; GO:0002694 regulation of leukocyte activation; GO:0006139 nucleobase-containing compound metabolic process; GO:0006351 transcription, DNA-templated; GO:0006…	GO:0005576 extracellular region; GO:0005622 intracellular; GO:0005623 cell; GO:0005634 nucleus; GO:0005730 nucleolus; GO:0005737 cytoplasm; GO:0005794 Golgi apparatus; GO:0005829 cytosol; GO:0005886 plasma membrane; GO:0005887 integral component of plasma membrane; GO:0012505 endomembrane system; GO:0016020 membrane; GO:0016021 integral component of membrane; GO:0031012 extracellular matrix; GO:0…	GO:0000981 DNA-binding transcription factor activity, RNA polymerase II-specific; GO:0001228 DNA-binding transcription activator activity, RNA polymerase II-specific; GO:0003700 DNA-binding transcription factor activity; GO:0005102 signaling receptor binding; GO:0005154 epidermal growth factor receptor binding; GO:0005215 transporter activity; GO:0005319 lipid transporter activity; GO:0005488 bin…	PF03803	Scramblase	K	KOG0621	Phospholipid scramblase
O15258	14	K	0.107	0.0390342	Down	Protein RER1 OS=Homo sapiens OX=9606 GN=RER1 PE=1 SV=1	RER1	1	2.16913e-22	203.76	3	SEGDSVGESVHGK(1)PSVVYR	-4.1892	5.191	0.83			0.495	0.271		0.289	0.133	0.235	plasma membrane				GO:0001941 postsynaptic membrane organization; GO:0006810 transport; GO:0006890 retrograde vesicle-mediated transport, Golgi to endoplasmic reticulum; GO:0007528 neuromuscular junction development; GO:0008104 protein localization; GO:0009987 cellular process; GO:0016043 cellular component organization; GO:0016192 vesicle-mediated transport; GO:0032879 regulation of localization; GO:0032880 regula…	GO:0000139 Golgi membrane; GO:0005622 intracellular; GO:0005623 cell; GO:0005737 cytoplasm; GO:0005793 endoplasmic reticulum-Golgi intermediate compartment; GO:0005794 Golgi apparatus; GO:0009986 cell surface; GO:0012505 endomembrane system; GO:0016020 membrane; GO:0016021 integral component of membrane; GO:0030173 integral component of Golgi membrane; GO:0031090 organelle membrane; GO:0031224 in…	GO:0005102 signaling receptor binding; GO:0005488 binding; GO:0005515 protein binding; GO:0033130 acetylcholine receptor binding;			U	KOG1688	Golgi proteins involved in ER retention (RER)
O60831	152	K	0.19	0.0449629	Down	PRA1 family protein 2 OS=Homo sapiens OX=9606 GN=PRAF2 PE=1 SV=1	PRAF2	1	2.82603e-10	157.77	2	IENK(1)IESIGLK(1)R	-2.7738	1.656	0.423	3.92			0.322	0.196	0.304	0.298	0.782	plasma membrane	K20392			GO:0003333 amino acid transmembrane transport; GO:0006810 transport; GO:0006811 ion transport; GO:0006820 anion transport; GO:0006835 dicarboxylic acid transport; GO:0006836 neurotransmitter transport; GO:0006855 drug transmembrane transport; GO:0006865 amino acid transport; GO:0015711 organic anion transport; GO:0015800 acidic amino acid transport; GO:0015807 L-amino acid transport; GO:0015813 L…					U	KOG4050	Glutamate transporter EAAC1-interacting protein GTRAP3-18
O94906	616	K	0.295	0.0220474	Down	Pre-mRNA-processing factor 6 OS=Homo sapiens OX=9606 GN=PRPF6 PE=1 SV=1	PRPF6	0.889097	3.86872e-05	110.52	2	AEVLWLMGAK(0.889)SK(0.111)	-3.3921	4.886	1.018	1.108	0.828	1.144	0.391	0.533	0.85	0.562	0.313	cytoplasm	K12855	PRPF6; pre-mRNA-processing factor 6	hsa03040 Spliceosome	GO:0000244 spliceosomal tri-snRNP complex assembly; GO:0000245 spliceosomal complex assembly; GO:0000375 RNA splicing, via transesterification reactions; GO:0000377 RNA splicing, via transesterification reactions with bulged adenosine as nucleophile; GO:0000387 spliceosomal snRNP assembly; GO:0000398 mRNA splicing, via spliceosome; GO:0006139 nucleobase-containing compound metabolic process; GO:0…	GO:0005622 intracellular; GO:0005623 cell; GO:0005634 nucleus; GO:0005654 nucleoplasm; GO:0005681 spliceosomal complex; GO:0005682 U5 snRNP; GO:0005684 U2-type spliceosomal complex; GO:0016604 nuclear body; GO:0016607 nuclear speck; GO:0030532 small nuclear ribonucleoprotein complex; GO:0031974 membrane-enclosed lumen; GO:0031981 nuclear lumen; GO:0032991 protein-containing complex; GO:0043226 or…	GO:0003676 nucleic acid binding; GO:0003712 transcription coregulator activity; GO:0003713 transcription coactivator activity; GO:0003723 RNA binding; GO:0005102 signaling receptor binding; GO:0005488 binding; GO:0005515 protein binding; GO:0008134 transcription factor binding; GO:0035257 nuclear hormone receptor binding; GO:0035258 steroid hormone receptor binding; GO:0043021 ribonucleoprotein c…	PF06424	PRP1 splicing factor, N-terminal	A	KOG0495	HAT repeat protein
O95183	33	K	0.528	0.018841	Down	Vesicle-associated membrane protein 5 OS=Homo sapiens OX=9606 GN=VAMP5 PE=1 SV=1	VAMP5	1	5.63471e-07	154.81	2	GVK(1)LAELQQR	-1.8275	1.503	1.12	1.284	1.086	1.755	0.942	0.318	0.927	0.917	0.456	cytoplasm	K08514	VAMP5; vesicle-associated membrane protein 5	hsa04130 SNARE interactions in vesicular transport	GO:0006810 transport; GO:0006887 exocytosis; GO:0006892 post-Golgi vesicle-mediated transport; GO:0006893 Golgi to plasma membrane transport; GO:0006906 vesicle fusion; GO:0006914 autophagy; GO:0006996 organelle organization; GO:0007275 multicellular organism development; GO:0007517 muscle organ development; GO:0007519 skeletal muscle tissue development; GO:0008104 protein localization; GO:000815…	GO:0000323 lytic vacuole; GO:0005622 intracellular; GO:0005623 cell; GO:0005737 cytoplasm; GO:0005764 lysosome; GO:0005765 lysosomal membrane; GO:0005768 endosome; GO:0005770 late endosome; GO:0005773 vacuole; GO:0005774 vacuolar membrane; GO:0005794 Golgi apparatus; GO:0005802 trans-Golgi network; GO:0005886 plasma membrane; GO:0005887 integral component of plasma membrane; GO:0005911 cell-cell …	GO:0000149 SNARE binding; GO:0005484 SNAP receptor activity; GO:0005488 binding; GO:0005515 protein binding;			U	KOG0860	Synaptobrevin/VAMP-like protein
O95870	3	K	0.202	0.0324627	Down	Phosphatidylserine lipase ABHD16A OS=Homo sapiens OX=9606 GN=ABHD16A PE=1 SV=3	ABHD16A	1	1.47588e-05	121.8	2	AK(1)LLSCVLGPR	-2.6187	2.03	0.301	1.173	1.94	0.664	0.13	0.466	0.146			mitochondria				GO:0006082 organic acid metabolic process; GO:0006629 lipid metabolic process; GO:0006631 fatty acid metabolic process; GO:0006638 neutral lipid metabolic process; GO:0006639 acylglycerol metabolic process; GO:0006690 icosanoid metabolic process; GO:0006692 prostanoid metabolic process; GO:0006693 prostaglandin metabolic process; GO:0008152 metabolic process; GO:0009056 catabolic process; GO:0009…		GO:0003824 catalytic activity; GO:0016298 lipase activity; GO:0016787 hydrolase activity; GO:0016788 hydrolase activity, acting on ester bonds; GO:0047372 acylglycerol lipase activity; GO:0052689 carboxylic ester hydrolase activity;	PF00561	alpha/beta hydrolase fold	I	KOG1553	Predicted alpha/beta hydrolase BAT5
O95870	429	K	0.26	0.0320442	Down	Phosphatidylserine lipase ABHD16A OS=Homo sapiens OX=9606 GN=ABHD16A PE=1 SV=3	ABHD16A	1	0.000336338	88.421	3	TK(1)DEIITTTVPEDIMSNR	0.64398	1.952			1.442			0.588	0.496		0.242	mitochondria				GO:0006082 organic acid metabolic process; GO:0006629 lipid metabolic process; GO:0006631 fatty acid metabolic process; GO:0006638 neutral lipid metabolic process; GO:0006639 acylglycerol metabolic process; GO:0006690 icosanoid metabolic process; GO:0006692 prostanoid metabolic process; GO:0006693 prostaglandin metabolic process; GO:0008152 metabolic process; GO:0009056 catabolic process; GO:0009…		GO:0003824 catalytic activity; GO:0016298 lipase activity; GO:0016787 hydrolase activity; GO:0016788 hydrolase activity, acting on ester bonds; GO:0047372 acylglycerol lipase activity; GO:0052689 carboxylic ester hydrolase activity;	PF00561	alpha/beta hydrolase fold	I	KOG1553	Predicted alpha/beta hydrolase BAT5
O96005	460	K	0.356	0.0115018	Down	Cleft lip and palate transmembrane protein 1 OS=Homo sapiens OX=9606 GN=CLPTM1 PE=1 SV=1	CLPTM1	1	1.03296e-07	154.66	2	DK(1)STYIESSTK	1.4294	2.684	1.204	0.556	1.138	1.643	0.514	0.361	0.619	0.378	0.699	plasma membrane				GO:0002682 regulation of immune system process; GO:0002694 regulation of leukocyte activation; GO:0007275 multicellular organism development; GO:0032501 multicellular organismal process; GO:0032502 developmental process; GO:0033081 regulation of T cell differentiation in thymus; GO:0045580 regulation of T cell differentiation; GO:0045595 regulation of cell differentiation; GO:0045619 regulation o…	GO:0005623 cell; GO:0005886 plasma membrane; GO:0005887 integral component of plasma membrane; GO:0009897 external side of plasma membrane; GO:0009986 cell surface; GO:0016020 membrane; GO:0016021 integral component of membrane; GO:0031224 intrinsic component of membrane; GO:0031226 intrinsic component of plasma membrane; GO:0071944 cell periphery; GO:0098552 side of membrane;				S	KOG2489	Transmembrane protein
P00533	970	K	0.234	0.00575193	Down	Epidermal growth factor receptor OS=Homo sapiens OX=9606 GN=EGFR PE=1 SV=2	EGFR	1	1.68038e-22	209.86	2	ELIIEFSK(1)MAR	2.1354	2.121	1.419	1.204		2.701	0.38		0.581	0.159	0.623	extracellular	K04361	EGFR; epidermal growth factor receptor [EC:2.7.10.1]	hsa05120 Epithelial cell signaling in Helicobacter pylori infection; hsa05160 Hepatitis C; hsa04014 Ras signaling pathway; hsa05224 Breast cancer; hsa01521 EGFR tyrosine kinase inhibitor resistance; hsa05200 Pathways in cancer; hsa05225 Hepatocellular carcinoma; hsa05205 Proteoglycans in cancer; hsa05226 Gastric cancer; hsa05206 MicroRNAs in cancer; hsa04012 ErbB signaling pathway; hsa04934 Cushi…	GO:0000003 reproduction; GO:0000079 regulation of cyclin-dependent protein serine/threonine kinase activity; GO:0000165 MAPK cascade; GO:0000186 activation of MAPKK activity; GO:0000302 response to reactive oxygen species; GO:0000902 cell morphogenesis; GO:0001101 response to acid chemical; GO:0001503 ossification; GO:0001558 regulation of cell growth; GO:0001654 eye development; GO:0001701 in ut…	GO:0005576 extracellular region; GO:0005615 extracellular space; GO:0005622 intracellular; GO:0005623 cell; GO:0005634 nucleus; GO:0005737 cytoplasm; GO:0005768 endosome; GO:0005769 early endosome; GO:0005770 late endosome; GO:0005771 multivesicular body; GO:0005886 plasma membrane; GO:0009986 cell surface; GO:0010008 endosome membrane; GO:0012505 endomembrane system; GO:0012506 vesicle membrane;…	GO:0003676 nucleic acid binding; GO:0003677 DNA binding; GO:0003682 chromatin binding; GO:0003690 double-stranded DNA binding; GO:0003779 actin binding; GO:0003824 catalytic activity; GO:0004672 protein kinase activity; GO:0004674 protein serine/threonine kinase activity; GO:0004709 MAP kinase kinase kinase activity; GO:0004713 protein tyrosine kinase activity; GO:0004714 transmembrane receptor p…	PF01030; PF00757; PF07714	Receptor L domain; Furin-like cysteine rich region; Protein tyrosine kinase	T	KOG1025	Epidermal growth factor receptor EGFR and related tyrosine kinases
P00533	875	K	0.321	0.029991	Down	Epidermal growth factor receptor OS=Homo sapiens OX=9606 GN=EGFR PE=1 SV=2	EGFR	0.999983	1.08658e-07	103.87	2	EYHAEGGK(1)VPIK	-0.01613	1.769	0.83	0.869		1.691	0.333				0.495	extracellular	K04361	EGFR; epidermal growth factor receptor [EC:2.7.10.1]	hsa05120 Epithelial cell signaling in Helicobacter pylori infection; hsa05160 Hepatitis C; hsa04014 Ras signaling pathway; hsa05224 Breast cancer; hsa01521 EGFR tyrosine kinase inhibitor resistance; hsa05200 Pathways in cancer; hsa05225 Hepatocellular carcinoma; hsa05205 Proteoglycans in cancer; hsa05226 Gastric cancer; hsa05206 MicroRNAs in cancer; hsa04012 ErbB signaling pathway; hsa04934 Cushi…	GO:0000003 reproduction; GO:0000079 regulation of cyclin-dependent protein serine/threonine kinase activity; GO:0000165 MAPK cascade; GO:0000186 activation of MAPKK activity; GO:0000302 response to reactive oxygen species; GO:0000902 cell morphogenesis; GO:0001101 response to acid chemical; GO:0001503 ossification; GO:0001558 regulation of cell growth; GO:0001654 eye development; GO:0001701 in ut…	GO:0005576 extracellular region; GO:0005615 extracellular space; GO:0005622 intracellular; GO:0005623 cell; GO:0005634 nucleus; GO:0005737 cytoplasm; GO:0005768 endosome; GO:0005769 early endosome; GO:0005770 late endosome; GO:0005771 multivesicular body; GO:0005886 plasma membrane; GO:0009986 cell surface; GO:0010008 endosome membrane; GO:0012505 endomembrane system; GO:0012506 vesicle membrane;…	GO:0003676 nucleic acid binding; GO:0003677 DNA binding; GO:0003682 chromatin binding; GO:0003690 double-stranded DNA binding; GO:0003779 actin binding; GO:0003824 catalytic activity; GO:0004672 protein kinase activity; GO:0004674 protein serine/threonine kinase activity; GO:0004709 MAP kinase kinase kinase activity; GO:0004713 protein tyrosine kinase activity; GO:0004714 transmembrane receptor p…	PF01030; PF00757; PF07714	Receptor L domain; Furin-like cysteine rich region; Protein tyrosine kinase	T	KOG1025	Epidermal growth factor receptor EGFR and related tyrosine kinases
P00533	737	K	0.382	0.0114277	Down	Epidermal growth factor receptor OS=Homo sapiens OX=9606 GN=EGFR PE=1 SV=2	EGFR	0.806453	0.00405533	63.397	2	GLWIPEGEK(0.806)VK(0.194)	-2.8456		1.584	1.783			0.523			0.592	0.814	extracellular	K04361	EGFR; epidermal growth factor receptor [EC:2.7.10.1]	hsa05120 Epithelial cell signaling in Helicobacter pylori infection; hsa05160 Hepatitis C; hsa04014 Ras signaling pathway; hsa05224 Breast cancer; hsa01521 EGFR tyrosine kinase inhibitor resistance; hsa05200 Pathways in cancer; hsa05225 Hepatocellular carcinoma; hsa05205 Proteoglycans in cancer; hsa05226 Gastric cancer; hsa05206 MicroRNAs in cancer; hsa04012 ErbB signaling pathway; hsa04934 Cushi…	GO:0000003 reproduction; GO:0000079 regulation of cyclin-dependent protein serine/threonine kinase activity; GO:0000165 MAPK cascade; GO:0000186 activation of MAPKK activity; GO:0000302 response to reactive oxygen species; GO:0000902 cell morphogenesis; GO:0001101 response to acid chemical; GO:0001503 ossification; GO:0001558 regulation of cell growth; GO:0001654 eye development; GO:0001701 in ut…	GO:0005576 extracellular region; GO:0005615 extracellular space; GO:0005622 intracellular; GO:0005623 cell; GO:0005634 nucleus; GO:0005737 cytoplasm; GO:0005768 endosome; GO:0005769 early endosome; GO:0005770 late endosome; GO:0005771 multivesicular body; GO:0005886 plasma membrane; GO:0009986 cell surface; GO:0010008 endosome membrane; GO:0012505 endomembrane system; GO:0012506 vesicle membrane;…	GO:0003676 nucleic acid binding; GO:0003677 DNA binding; GO:0003682 chromatin binding; GO:0003690 double-stranded DNA binding; GO:0003779 actin binding; GO:0003824 catalytic activity; GO:0004672 protein kinase activity; GO:0004674 protein serine/threonine kinase activity; GO:0004709 MAP kinase kinase kinase activity; GO:0004713 protein tyrosine kinase activity; GO:0004714 transmembrane receptor p…	PF01030; PF00757; PF07714	Receptor L domain; Furin-like cysteine rich region; Protein tyrosine kinase	T	KOG1025	Epidermal growth factor receptor EGFR and related tyrosine kinases
P00533	739	K	0.133	0.00164004	Down	Epidermal growth factor receptor OS=Homo sapiens OX=9606 GN=EGFR PE=1 SV=2	EGFR	0.999958	0.00405533	65.404	2	VK(1)IPVAIK	-1.8397	1.594				1.771	0.21			0.238		extracellular	K04361	EGFR; epidermal growth factor receptor [EC:2.7.10.1]	hsa05120 Epithelial cell signaling in Helicobacter pylori infection; hsa05160 Hepatitis C; hsa04014 Ras signaling pathway; hsa05224 Breast cancer; hsa01521 EGFR tyrosine kinase inhibitor resistance; hsa05200 Pathways in cancer; hsa05225 Hepatocellular carcinoma; hsa05205 Proteoglycans in cancer; hsa05226 Gastric cancer; hsa05206 MicroRNAs in cancer; hsa04012 ErbB signaling pathway; hsa04934 Cushi…	GO:0000003 reproduction; GO:0000079 regulation of cyclin-dependent protein serine/threonine kinase activity; GO:0000165 MAPK cascade; GO:0000186 activation of MAPKK activity; GO:0000302 response to reactive oxygen species; GO:0000902 cell morphogenesis; GO:0001101 response to acid chemical; GO:0001503 ossification; GO:0001558 regulation of cell growth; GO:0001654 eye development; GO:0001701 in ut…	GO:0005576 extracellular region; GO:0005615 extracellular space; GO:0005622 intracellular; GO:0005623 cell; GO:0005634 nucleus; GO:0005737 cytoplasm; GO:0005768 endosome; GO:0005769 early endosome; GO:0005770 late endosome; GO:0005771 multivesicular body; GO:0005886 plasma membrane; GO:0009986 cell surface; GO:0010008 endosome membrane; GO:0012505 endomembrane system; GO:0012506 vesicle membrane;…	GO:0003676 nucleic acid binding; GO:0003677 DNA binding; GO:0003682 chromatin binding; GO:0003690 double-stranded DNA binding; GO:0003779 actin binding; GO:0003824 catalytic activity; GO:0004672 protein kinase activity; GO:0004674 protein serine/threonine kinase activity; GO:0004709 MAP kinase kinase kinase activity; GO:0004713 protein tyrosine kinase activity; GO:0004714 transmembrane receptor p…	PF01030; PF00757; PF07714	Receptor L domain; Furin-like cysteine rich region; Protein tyrosine kinase	T	KOG1025	Epidermal growth factor receptor EGFR and related tyrosine kinases
P00533	716	K	0.304	0.0230773	Down	Epidermal growth factor receptor OS=Homo sapiens OX=9606 GN=EGFR PE=1 SV=2	EGFR	1	7.36006e-10	151.08	2	IK(1)VLGSGAFGTVYK	-1.7873	2.276	0.983	1.28		2.625	0.282		1.09	0.218	0.589	extracellular	K04361	EGFR; epidermal growth factor receptor [EC:2.7.10.1]	hsa05120 Epithelial cell signaling in Helicobacter pylori infection; hsa05160 Hepatitis C; hsa04014 Ras signaling pathway; hsa05224 Breast cancer; hsa01521 EGFR tyrosine kinase inhibitor resistance; hsa05200 Pathways in cancer; hsa05225 Hepatocellular carcinoma; hsa05205 Proteoglycans in cancer; hsa05226 Gastric cancer; hsa05206 MicroRNAs in cancer; hsa04012 ErbB signaling pathway; hsa04934 Cushi…	GO:0000003 reproduction; GO:0000079 regulation of cyclin-dependent protein serine/threonine kinase activity; GO:0000165 MAPK cascade; GO:0000186 activation of MAPKK activity; GO:0000302 response to reactive oxygen species; GO:0000902 cell morphogenesis; GO:0001101 response to acid chemical; GO:0001503 ossification; GO:0001558 regulation of cell growth; GO:0001654 eye development; GO:0001701 in ut…	GO:0005576 extracellular region; GO:0005615 extracellular space; GO:0005622 intracellular; GO:0005623 cell; GO:0005634 nucleus; GO:0005737 cytoplasm; GO:0005768 endosome; GO:0005769 early endosome; GO:0005770 late endosome; GO:0005771 multivesicular body; GO:0005886 plasma membrane; GO:0009986 cell surface; GO:0010008 endosome membrane; GO:0012505 endomembrane system; GO:0012506 vesicle membrane;…	GO:0003676 nucleic acid binding; GO:0003677 DNA binding; GO:0003682 chromatin binding; GO:0003690 double-stranded DNA binding; GO:0003779 actin binding; GO:0003824 catalytic activity; GO:0004672 protein kinase activity; GO:0004674 protein serine/threonine kinase activity; GO:0004709 MAP kinase kinase kinase activity; GO:0004713 protein tyrosine kinase activity; GO:0004714 transmembrane receptor p…	PF01030; PF00757; PF07714	Receptor L domain; Furin-like cysteine rich region; Protein tyrosine kinase	T	KOG1025	Epidermal growth factor receptor EGFR and related tyrosine kinases
P00533	867	K	0.235	0.0318986	Down	Epidermal growth factor receptor OS=Homo sapiens OX=9606 GN=EGFR PE=1 SV=2	EGFR	1	4.75007e-11	163.93	2	LLGAEEK(1)EYHAEGGK	11.636	2.214	0.616	1.032		2.328	0.162		0.522		0.406	extracellular	K04361	EGFR; epidermal growth factor receptor [EC:2.7.10.1]	hsa05120 Epithelial cell signaling in Helicobacter pylori infection; hsa05160 Hepatitis C; hsa04014 Ras signaling pathway; hsa05224 Breast cancer; hsa01521 EGFR tyrosine kinase inhibitor resistance; hsa05200 Pathways in cancer; hsa05225 Hepatocellular carcinoma; hsa05205 Proteoglycans in cancer; hsa05226 Gastric cancer; hsa05206 MicroRNAs in cancer; hsa04012 ErbB signaling pathway; hsa04934 Cushi…	GO:0000003 reproduction; GO:0000079 regulation of cyclin-dependent protein serine/threonine kinase activity; GO:0000165 MAPK cascade; GO:0000186 activation of MAPKK activity; GO:0000302 response to reactive oxygen species; GO:0000902 cell morphogenesis; GO:0001101 response to acid chemical; GO:0001503 ossification; GO:0001558 regulation of cell growth; GO:0001654 eye development; GO:0001701 in ut…	GO:0005576 extracellular region; GO:0005615 extracellular space; GO:0005622 intracellular; GO:0005623 cell; GO:0005634 nucleus; GO:0005737 cytoplasm; GO:0005768 endosome; GO:0005769 early endosome; GO:0005770 late endosome; GO:0005771 multivesicular body; GO:0005886 plasma membrane; GO:0009986 cell surface; GO:0010008 endosome membrane; GO:0012505 endomembrane system; GO:0012506 vesicle membrane;…	GO:0003676 nucleic acid binding; GO:0003677 DNA binding; GO:0003682 chromatin binding; GO:0003690 double-stranded DNA binding; GO:0003779 actin binding; GO:0003824 catalytic activity; GO:0004672 protein kinase activity; GO:0004674 protein serine/threonine kinase activity; GO:0004709 MAP kinase kinase kinase activity; GO:0004713 protein tyrosine kinase activity; GO:0004714 transmembrane receptor p…	PF01030; PF00757; PF07714	Receptor L domain; Furin-like cysteine rich region; Protein tyrosine kinase	T	KOG1025	Epidermal growth factor receptor EGFR and related tyrosine kinases
P00915	46	K	0.211	0.0348966	Down	Carbonic anhydrase 1 OS=Homo sapiens OX=9606 GN=CA1 PE=1 SV=2	CA1	1	2.93935e-10	155.34	3	HDTSLK(1)PISVSYNPATAK	0.21919	1.447				0.92	0.202				0.297	cytoplasm	K01672	CA; carbonic anhydrase [EC:4.2.1.1]	hsa00910 Nitrogen metabolism; hsa01100 Metabolic pathways	GO:0006810 transport; GO:0006811 ion transport; GO:0006820 anion transport; GO:0007154 cell communication; GO:0007165 signal transduction; GO:0007166 cell surface receptor signaling pathway; GO:0009987 cellular process; GO:0010033 response to organic substance; GO:0015701 bicarbonate transport; GO:0015711 organic anion transport; GO:0019221 cytokine-mediated signaling pathway; GO:0023052 signalin…	GO:0005622 intracellular; GO:0005623 cell; GO:0005737 cytoplasm; GO:0005829 cytosol;	GO:0003824 catalytic activity; GO:0004064 arylesterase activity; GO:0004089 carbonate dehydratase activity; GO:0016787 hydrolase activity; GO:0016788 hydrolase activity, acting on ester bonds; GO:0016829 lyase activity; GO:0016835 carbon-oxygen lyase activity; GO:0016836 hydro-lyase activity; GO:0052689 carboxylic ester hydrolase activity;	PF00194	Eukaryotic-type carbonic anhydrase	P	KOG0382	Carbonic anhydrase
P02549	329	K	0.392	0.0331355	Down	Spectrin alpha chain, erythrocytic 1 OS=Homo sapiens OX=9606 GN=SPTA1 PE=1 SV=5	SPTA1	1	2.15591e-22	182.1	3	AEK(1)LTLSHPSDAPQIQEMK	-1.7434	1.891	0.586			1.649	0.528	0.376	0.648	0.47	0.673	cytoplasm	K06114	SPTA; spectrin alpha	hsa04210 Apoptosis	GO:0000165 MAPK cascade; GO:0000902 cell morphogenesis; GO:0000904 cell morphogenesis involved in differentiation; GO:0001776 leukocyte homeostasis; GO:0002260 lymphocyte homeostasis; GO:0002376 immune system process; GO:0002520 immune system development; GO:0002682 regulation of immune system process; GO:0002684 positive regulation of immune system process; GO:0002694 regulation of leukocyte act…	GO:0005622 intracellular; GO:0005623 cell; GO:0005737 cytoplasm; GO:0005829 cytosol; GO:0005856 cytoskeleton; GO:0005886 plasma membrane; GO:0005938 cell cortex; GO:0008091 spectrin; GO:0009898 cytoplasmic side of plasma membrane; GO:0014731 spectrin-associated cytoskeleton; GO:0015629 actin cytoskeleton; GO:0016020 membrane; GO:0030424 axon; GO:0030863 cortical cytoskeleton; GO:0030864 cortical …	GO:0003779 actin binding; GO:0005085 guanyl-nucleotide exchange factor activity; GO:0005088 Ras guanyl-nucleotide exchange factor activity; GO:0005198 structural molecule activity; GO:0005200 structural constituent of cytoskeleton; GO:0005488 binding; GO:0005515 protein binding; GO:0008092 cytoskeletal protein binding; GO:0017016 Ras GTPase binding; GO:0019899 enzyme binding; GO:0031267 small GTP…	PF00435; PF00018; PF08726	Spectrin repeat; SH3 domain; Ca2+ insensitive EF hand	Z	KOG0040	Ca2+-binding actin-bundling protein (spectrin), alpha chain (EF-Hand protein superfamily)
P02549	1915	K	0.111	0.0253554	Down	Spectrin alpha chain, erythrocytic 1 OS=Homo sapiens OX=9606 GN=SPTA1 PE=1 SV=5	SPTA1	1	2.89451e-07	108.4	2	TPSLAK(1)AIAAWK	-1.5767	3.217				1.344	0.121			0.315	0.323	cytoplasm	K06114	SPTA; spectrin alpha	hsa04210 Apoptosis	GO:0000165 MAPK cascade; GO:0000902 cell morphogenesis; GO:0000904 cell morphogenesis involved in differentiation; GO:0001776 leukocyte homeostasis; GO:0002260 lymphocyte homeostasis; GO:0002376 immune system process; GO:0002520 immune system development; GO:0002682 regulation of immune system process; GO:0002684 positive regulation of immune system process; GO:0002694 regulation of leukocyte act…	GO:0005622 intracellular; GO:0005623 cell; GO:0005737 cytoplasm; GO:0005829 cytosol; GO:0005856 cytoskeleton; GO:0005886 plasma membrane; GO:0005938 cell cortex; GO:0008091 spectrin; GO:0009898 cytoplasmic side of plasma membrane; GO:0014731 spectrin-associated cytoskeleton; GO:0015629 actin cytoskeleton; GO:0016020 membrane; GO:0030424 axon; GO:0030863 cortical cytoskeleton; GO:0030864 cortical …	GO:0003779 actin binding; GO:0005085 guanyl-nucleotide exchange factor activity; GO:0005088 Ras guanyl-nucleotide exchange factor activity; GO:0005198 structural molecule activity; GO:0005200 structural constituent of cytoskeleton; GO:0005488 binding; GO:0005515 protein binding; GO:0008092 cytoskeletal protein binding; GO:0017016 Ras GTPase binding; GO:0019899 enzyme binding; GO:0031267 small GTP…	PF00435; PF00018; PF08726	Spectrin repeat; SH3 domain; Ca2+ insensitive EF hand	Z	KOG0040	Ca2+-binding actin-bundling protein (spectrin), alpha chain (EF-Hand protein superfamily)
P02549	2132	K	0.292	0.0334124	Down	Spectrin alpha chain, erythrocytic 1 OS=Homo sapiens OX=9606 GN=SPTA1 PE=1 SV=5	SPTA1	1	2.60177e-10	126.21	2	TWK(1)HLSDIIEER	-0.68764	1.615				1.739	0.304		1.002	0.314	0.342	cytoplasm	K06114	SPTA; spectrin alpha	hsa04210 Apoptosis	GO:0000165 MAPK cascade; GO:0000902 cell morphogenesis; GO:0000904 cell morphogenesis involved in differentiation; GO:0001776 leukocyte homeostasis; GO:0002260 lymphocyte homeostasis; GO:0002376 immune system process; GO:0002520 immune system development; GO:0002682 regulation of immune system process; GO:0002684 positive regulation of immune system process; GO:0002694 regulation of leukocyte act…	GO:0005622 intracellular; GO:0005623 cell; GO:0005737 cytoplasm; GO:0005829 cytosol; GO:0005856 cytoskeleton; GO:0005886 plasma membrane; GO:0005938 cell cortex; GO:0008091 spectrin; GO:0009898 cytoplasmic side of plasma membrane; GO:0014731 spectrin-associated cytoskeleton; GO:0015629 actin cytoskeleton; GO:0016020 membrane; GO:0030424 axon; GO:0030863 cortical cytoskeleton; GO:0030864 cortical …	GO:0003779 actin binding; GO:0005085 guanyl-nucleotide exchange factor activity; GO:0005088 Ras guanyl-nucleotide exchange factor activity; GO:0005198 structural molecule activity; GO:0005200 structural constituent of cytoskeleton; GO:0005488 binding; GO:0005515 protein binding; GO:0008092 cytoskeletal protein binding; GO:0017016 Ras GTPase binding; GO:0019899 enzyme binding; GO:0031267 small GTP…	PF00435; PF00018; PF08726	Spectrin repeat; SH3 domain; Ca2+ insensitive EF hand	Z	KOG0040	Ca2+-binding actin-bundling protein (spectrin), alpha chain (EF-Hand protein superfamily)
P02794	72	K	0.627	0.0198701	Down	Ferritin heavy chain OS=Homo sapiens OX=9606 GN=FTH1 PE=1 SV=2	FTH1	1	0.00148749	100.75	2	LMK(1)LQNQR	-1.8112	1.143		0.893		0.934	0.545	0.727	0.533	0.833	0.465	cytoplasm	K00522	FTH1; ferritin heavy chain [EC:1.16.3.2]	hsa04216 Ferroptosis; hsa04978 Mineral absorption; hsa04217 Necroptosis	GO:0002376 immune system process; GO:0006873 cellular ion homeostasis; GO:0006875 cellular metal ion homeostasis; GO:0006879 cellular iron ion homeostasis; GO:0006880 intracellular sequestering of iron ion; GO:0006955 immune response; GO:0008285 negative regulation of cell population proliferation; GO:0009987 cellular process; GO:0019725 cellular homeostasis; GO:0030003 cellular cation homeostasi…	GO:0005622 intracellular; GO:0005623 cell; GO:0005737 cytoplasm;	GO:0005488 binding; GO:0005506 iron ion binding; GO:0043167 ion binding; GO:0043169 cation binding; GO:0046872 metal ion binding; GO:0046914 transition metal ion binding;	PF00210	Ferritin-like domain	P	KOG2332	Ferritin
P09471	51	K	0.322	0.031192	Down	Guanine nucleotide-binding protein G(o) subunit alpha OS=Homo sapiens OX=9606 GN=GNAO1 PE=1 SV=4	GNAO1	0.999827	0.00732646	75.243	2	STIVK(1)QMK	11.474	3.969				2.334	0.587	1.074		0.804	1.595	cytoplasm,mitochondria	K04534	GNAO; guanine nucleotide-binding protein G(o) subunit alpha	hsa04725 Cholinergic synapse; hsa04921 Oxytocin signaling pathway; hsa05170 Human immunodeficiency virus 1 infection; hsa04727 GABAergic synapse; hsa04713 Circadian entrainment; hsa05145 Toxoplasmosis; hsa04015 Rap1 signaling pathway; hsa05034 Alcoholism; hsa04915 Estrogen signaling pathway; hsa04926 Relaxin signaling pathway; hsa05032 Morphine addiction; hsa04724 Glutamatergic synapse; hsa05142 …	GO:0000302 response to reactive oxygen species; GO:0003008 system process; GO:0003012 muscle system process; GO:0006457 protein folding; GO:0006936 muscle contraction; GO:0006950 response to stress; GO:0006979 response to oxidative stress; GO:0007154 cell communication; GO:0007165 signal transduction; GO:0007166 cell surface receptor signaling pathway; GO:0007186 G protein-coupled receptor signal…	GO:0005622 intracellular; GO:0005623 cell; GO:0005834 heterotrimeric G-protein complex; GO:0005886 plasma membrane; GO:0009898 cytoplasmic side of plasma membrane; GO:0016020 membrane; GO:0019897 extrinsic component of plasma membrane; GO:0019898 extrinsic component of membrane; GO:0030425 dendrite; GO:0031234 extrinsic component of cytoplasmic side of plasma membrane; GO:0032991 protein-containi…	GO:0000166 nucleotide binding; GO:0001664 G protein-coupled receptor binding; GO:0001882 nucleoside binding; GO:0001883 purine nucleoside binding; GO:0003824 catalytic activity; GO:0003924 GTPase activity; GO:0005102 signaling receptor binding; GO:0005488 binding; GO:0005515 protein binding; GO:0005525 GTP binding; GO:0016462 pyrophosphatase activity; GO:0016787 hydrolase activity; GO:0016817 hyd…	PF00503	G-protein alpha subunit	DT	KOG0082	G-protein alpha subunit (small G protein superfamily)
P05060	465	K	3.277	0.031694	Up	Secretogranin-1 OS=Homo sapiens OX=9606 GN=CHGB PE=1 SV=2	CHGB	1	6.92721e-06	127.93	3	RHPQGAWK(1)ELDR	-0.42896			0.666	0.479	0.53	2.944		0.964	1.581		extracellular	K19991			GO:0006464 cellular protein modification process; GO:0006807 nitrogen compound metabolic process; GO:0006810 transport; GO:0006887 exocytosis; GO:0008152 metabolic process; GO:0009966 regulation of signal transduction; GO:0009987 cellular process; GO:0010469 regulation of signaling receptor activity; GO:0010646 regulation of cell communication; GO:0016192 vesicle-mediated transport; GO:0019538 pr…	GO:0005576 extracellular region; GO:0005622 intracellular; GO:0005623 cell; GO:0005737 cytoplasm; GO:0005783 endoplasmic reticulum; GO:0005788 endoplasmic reticulum lumen; GO:0012505 endomembrane system; GO:0012506 vesicle membrane; GO:0016020 membrane; GO:0030133 transport vesicle; GO:0030141 secretory granule; GO:0030658 transport vesicle membrane; GO:0030659 cytoplasmic vesicle membrane; GO:00…	GO:0005102 signaling receptor binding; GO:0005179 hormone activity; GO:0005488 binding; GO:0005515 protein binding; GO:0030545 receptor regulator activity; GO:0048018 receptor ligand activity; GO:0098772 molecular function regulator;
P05106	755	K	0.483	0.0359422	Down	Integrin beta-3 OS=Homo sapiens OX=9606 GN=ITGB3 PE=1 SV=2	ITGB3	1	0.000362714	120.33	2	EFAK(1)FEEER	1.0966	1.831	0.919	1.355		0.783	0.63			0.543	0.599	plasma membrane	K06493	ITGB3; integrin beta 3	hsa04380 Osteoclast differentiation; hsa04510 Focal adhesion; hsa05412 Arrhythmogenic right ventricular cardiomyopathy; hsa04919 Thyroid hormone signaling pathway; hsa05418 Fluid shear stress and atherosclerosis; hsa04512 ECM-receptor interaction; hsa05168 Herpes simplex virus 1 infection; hsa05165 Human papillomavirus infection; hsa05205 Proteoglycans in cancer; hsa05206 MicroRNAs in cancer; hsa…	GO:0000902 cell morphogenesis; GO:0000904 cell morphogenesis involved in differentiation; GO:0001525 angiogenesis; GO:0001568 blood vessel development; GO:0001704 formation of primary germ layer; GO:0001707 mesoderm formation; GO:0001775 cell activation; GO:0001932 regulation of protein phosphorylation; GO:0001934 positive regulation of protein phosphorylation; GO:0001936 regulation of endothelia…	GO:0001726 ruffle; GO:0005622 intracellular; GO:0005623 cell; GO:0005634 nucleus; GO:0005737 cytoplasm; GO:0005886 plasma membrane; GO:0005887 integral component of plasma membrane; GO:0005902 microvillus; GO:0005912 adherens junction; GO:0005925 focal adhesion; GO:0008305 integrin complex; GO:0009897 external side of plasma membrane; GO:0009986 cell surface; GO:0012505 endomembrane system; GO:00…	GO:0001968 fibronectin binding; GO:0002020 protease binding; GO:0003756 protein disulfide isomerase activity; GO:0003824 catalytic activity; GO:0005080 protein kinase C binding; GO:0005102 signaling receptor binding; GO:0005126 cytokine receptor binding; GO:0005161 platelet-derived growth factor receptor binding; GO:0005172 vascular endothelial growth factor receptor binding; GO:0005178 integrin …	PF00362; PF07974; PF07965; PF08725	Integrin, beta chain; EGF-like domain; Integrin beta tail domain; Integrin beta cytoplasmic domain	T	KOG1226	Integrin beta subunit (N-terminal portion of extracellular region)
P05388	106	K	0.521	0.0371585	Down	60S acidic ribosomal protein P0 OS=Homo sapiens OX=9606 GN=RPLP0 PE=1 SV=1	RPLP0	1	7.56098e-16	159.93	2	DMLLANK(1)VPAAAR	-4.1513	1.273	0.928	0.773	1.884	1.592	0.595	0.417	1.106	0.57		cytoplasm,nucleus	K02941	RP-LP0; large subunit ribosomal protein LP0	hsa03010 Ribosome; hsa05171 Coronavirus disease - COVID-19	GO:0000184 nuclear-transcribed mRNA catabolic process, nonsense-mediated decay; GO:0000956 nuclear-transcribed mRNA catabolic process; GO:0006139 nucleobase-containing compound metabolic process; GO:0006401 RNA catabolic process; GO:0006402 mRNA catabolic process; GO:0006412 translation; GO:0006413 translational initiation; GO:0006518 peptide metabolic process; GO:0006605 protein targeting; GO:00…	GO:0005622 intracellular; GO:0005623 cell; GO:0005634 nucleus; GO:0005737 cytoplasm; GO:0005783 endoplasmic reticulum; GO:0005829 cytosol; GO:0005840 ribosome; GO:0012505 endomembrane system; GO:0015934 large ribosomal subunit; GO:0022625 cytosolic large ribosomal subunit; GO:0022626 cytosolic ribosome; GO:0032991 protein-containing complex; GO:0035770 ribonucleoprotein granule; GO:0036464 cytopl…	GO:0003735 structural constituent of ribosome; GO:0005198 structural molecule activity;			J	KOG0815	60S acidic ribosomal protein P0
P05388	50	K	0.252	0.0449598	Down	60S acidic ribosomal protein P0 OS=Homo sapiens OX=9606 GN=RPLP0 PE=1 SV=1	RPLP0	1	0.00177646	87.251	2	GK(1)AVVLMGK	-0.62048	1.548		1.549		0.704				0.223	0.415	cytoplasm,nucleus	K02941	RP-LP0; large subunit ribosomal protein LP0	hsa03010 Ribosome; hsa05171 Coronavirus disease - COVID-19	GO:0000184 nuclear-transcribed mRNA catabolic process, nonsense-mediated decay; GO:0000956 nuclear-transcribed mRNA catabolic process; GO:0006139 nucleobase-containing compound metabolic process; GO:0006401 RNA catabolic process; GO:0006402 mRNA catabolic process; GO:0006412 translation; GO:0006413 translational initiation; GO:0006518 peptide metabolic process; GO:0006605 protein targeting; GO:00…	GO:0005622 intracellular; GO:0005623 cell; GO:0005634 nucleus; GO:0005737 cytoplasm; GO:0005783 endoplasmic reticulum; GO:0005829 cytosol; GO:0005840 ribosome; GO:0012505 endomembrane system; GO:0015934 large ribosomal subunit; GO:0022625 cytosolic large ribosomal subunit; GO:0022626 cytosolic ribosome; GO:0032991 protein-containing complex; GO:0035770 ribonucleoprotein granule; GO:0036464 cytopl…	GO:0003735 structural constituent of ribosome; GO:0005198 structural molecule activity;			J	KOG0815	60S acidic ribosomal protein P0
P05556	768	K	0.118	0.0173432	Down	Integrin beta-1 OS=Homo sapiens OX=9606 GN=ITGB1 PE=1 SV=2	ITGB1	0.998357	3.45928e-09	162.49	2	EFAK(1)FEK(0.998)EK(0.002)	8.9173	3.683		1.242	1.359	0.438	0.19	0.129			0.278	extracellular	K05719	ITGB1; integrin beta 1	hsa04510 Focal adhesion; hsa04360 Axon guidance; hsa05412 Arrhythmogenic right ventricular cardiomyopathy; hsa05200 Pathways in cancer; hsa05131 Shigellosis; hsa04512 ECM-receptor interaction; hsa05165 Human papillomavirus infection; hsa04670 Leukocyte transendothelial migration; hsa05145 Toxoplasmosis; hsa05205 Proteoglycans in cancer; hsa04514 Cell adhesion molecules; hsa04015 Rap1 signaling pa…	GO:0000003 reproduction; GO:0000082 G1/S transition of mitotic cell cycle; GO:0000278 mitotic cell cycle; GO:0000902 cell morphogenesis; GO:0000904 cell morphogenesis involved in differentiation; GO:0001525 angiogenesis; GO:0001568 blood vessel development; GO:0001667 ameboidal-type cell migration; GO:0001701 in utero embryonic development; GO:0001704 formation of primary germ layer; GO:0001707 m…	GO:0001669 acrosomal vesicle; GO:0001726 ruffle; GO:0005576 extracellular region; GO:0005604 basement membrane; GO:0005622 intracellular; GO:0005623 cell; GO:0005737 cytoplasm; GO:0005886 plasma membrane; GO:0005887 integral component of plasma membrane; GO:0005911 cell-cell junction; GO:0005912 adherens junction; GO:0005925 focal adhesion; GO:0008305 integrin complex; GO:0009897 external side of…	GO:0001968 fibronectin binding; GO:0002020 protease binding; GO:0003779 actin binding; GO:0005102 signaling receptor binding; GO:0005178 integrin binding; GO:0005488 binding; GO:0005515 protein binding; GO:0005518 collagen binding; GO:0008092 cytoskeletal protein binding; GO:0015026 coreceptor activity; GO:0019899 enzyme binding; GO:0019900 kinase binding; GO:0019901 protein kinase binding; GO:00…	PF00362; PF07974; PF07965; PF08725	Integrin, beta chain; EGF-like domain; Integrin beta tail domain; Integrin beta cytoplasmic domain	W	KOG1226	Integrin beta subunit (N-terminal portion of extracellular region)
P05556	794	K	0.301	0.0214911	Down	Integrin beta-1 OS=Homo sapiens OX=9606 GN=ITGB1 PE=1 SV=2	ITGB1	0.997635	1.02774e-31	178.65	2	SAVTTVVNPK(0.998)YEGK(0.002)	1.5974	3.247	0.432	1.218	1.994	1.042	0.351	0.399	0.706	0.496	0.437	extracellular	K05719	ITGB1; integrin beta 1	hsa04510 Focal adhesion; hsa04360 Axon guidance; hsa05412 Arrhythmogenic right ventricular cardiomyopathy; hsa05200 Pathways in cancer; hsa05131 Shigellosis; hsa04512 ECM-receptor interaction; hsa05165 Human papillomavirus infection; hsa04670 Leukocyte transendothelial migration; hsa05145 Toxoplasmosis; hsa05205 Proteoglycans in cancer; hsa04514 Cell adhesion molecules; hsa04015 Rap1 signaling pa…	GO:0000003 reproduction; GO:0000082 G1/S transition of mitotic cell cycle; GO:0000278 mitotic cell cycle; GO:0000902 cell morphogenesis; GO:0000904 cell morphogenesis involved in differentiation; GO:0001525 angiogenesis; GO:0001568 blood vessel development; GO:0001667 ameboidal-type cell migration; GO:0001701 in utero embryonic development; GO:0001704 formation of primary germ layer; GO:0001707 m…	GO:0001669 acrosomal vesicle; GO:0001726 ruffle; GO:0005576 extracellular region; GO:0005604 basement membrane; GO:0005622 intracellular; GO:0005623 cell; GO:0005737 cytoplasm; GO:0005886 plasma membrane; GO:0005887 integral component of plasma membrane; GO:0005911 cell-cell junction; GO:0005912 adherens junction; GO:0005925 focal adhesion; GO:0008305 integrin complex; GO:0009897 external side of…	GO:0001968 fibronectin binding; GO:0002020 protease binding; GO:0003779 actin binding; GO:0005102 signaling receptor binding; GO:0005178 integrin binding; GO:0005488 binding; GO:0005515 protein binding; GO:0005518 collagen binding; GO:0008092 cytoskeletal protein binding; GO:0015026 coreceptor activity; GO:0019899 enzyme binding; GO:0019900 kinase binding; GO:0019901 protein kinase binding; GO:00…	PF00362; PF07974; PF07965; PF08725	Integrin, beta chain; EGF-like domain; Integrin beta tail domain; Integrin beta cytoplasmic domain	W	KOG1226	Integrin beta subunit (N-terminal portion of extracellular region)
P07737	126	K	0.346	0.0415299	Down	Profilin-1 OS=Homo sapiens OX=9606 GN=PFN1 PE=1 SV=2	PFN1	0.999294	1.93049e-22	211.85	2	EGVHGGLINK(0.999)K(0.001)	2.7566	1.451				0.999	0.374				0.474	cytoplasm	K05759	PFN; profilin	hsa04810 Regulation of actin cytoskeleton; hsa05132 Salmonella infection; hsa04015 Rap1 signaling pathway; hsa05014 Amyotrophic lateral sclerosis; hsa05131 Shigellosis	GO:0001838 embryonic epithelial tube formation; GO:0001841 neural tube formation; GO:0001843 neural tube closure; GO:0002009 morphogenesis of an epithelium; GO:0006355 regulation of transcription, DNA-templated; GO:0006357 regulation of transcription by RNA polymerase II; GO:0006996 organelle organization; GO:0007010 cytoskeleton organization; GO:0007015 actin filament organization; GO:0007154 ce…	GO:0005576 extracellular region; GO:0005622 intracellular; GO:0005623 cell; GO:0005634 nucleus; GO:0005737 cytoplasm; GO:0005829 cytosol; GO:0005856 cytoskeleton; GO:0005938 cell cortex; GO:0042995 cell projection; GO:0043005 neuron projection; GO:0043226 organelle; GO:0043227 membrane-bounded organelle; GO:0043228 non-membrane-bounded organelle; GO:0043229 intracellular organelle; GO:0043231 int…	GO:0000166 nucleotide binding; GO:0000774 adenyl-nucleotide exchange factor activity; GO:0003779 actin binding; GO:0003785 actin monomer binding; GO:0005102 signaling receptor binding; GO:0005488 binding; GO:0005515 protein binding; GO:0005543 phospholipid binding; GO:0005546 phosphatidylinositol-4,5-bisphosphate binding; GO:0008092 cytoskeletal protein binding; GO:0008289 lipid binding; GO:00170…	PF00235	Profilin	Z	KOG1755	Profilin
P61586	7	K	0.392	0.0497505	Down	Transforming protein RhoA OS=Homo sapiens OX=9606 GN=RHOA PE=1 SV=1	RHOA	1	7.84774e-05	106.35	2	K(1)LVIVGDGACGK	7.2115	2.044	1.497			0.931	0.568	0.959		0.568	0.243	cytoplasm	K04513	RHOA; Ras homolog gene family, member A	hsa04014 Ras signaling pathway; hsa04270 Vascular smooth muscle contraction; hsa04360 Axon guidance; hsa04350 TGF-beta signaling pathway; hsa05203 Viral carcinogenesis; hsa05200 Pathways in cancer; hsa04310 Wnt signaling pathway; hsa04621 NOD-like receptor signaling pathway; hsa05205 Proteoglycans in cancer; hsa05206 MicroRNAs in cancer; hsa04660 T cell receptor signaling pathway; hsa04071 Sphing…	GO:0000226 microtubule cytoskeleton organization; GO:0000278 mitotic cell cycle; GO:0000280 nuclear division; GO:0000281 mitotic cytokinesis; GO:0000910 cytokinesis; GO:0001501 skeletal system development; GO:0001503 ossification; GO:0001667 ameboidal-type cell migration; GO:0001738 morphogenesis of a polarized epithelium; GO:0001775 cell activation; GO:0001932 regulation of protein phosphorylati…	GO:0005622 intracellular; GO:0005623 cell; GO:0005737 cytoplasm; GO:0005768 endosome; GO:0005783 endoplasmic reticulum; GO:0005789 endoplasmic reticulum membrane; GO:0005829 cytosol; GO:0005886 plasma membrane; GO:0005911 cell-cell junction; GO:0005938 cell cortex; GO:0009898 cytoplasmic side of plasma membrane; GO:0012505 endomembrane system; GO:0012506 vesicle membrane; GO:0016020 membrane; GO:…	GO:0000166 nucleotide binding; GO:0001882 nucleoside binding; GO:0001883 purine nucleoside binding; GO:0003824 catalytic activity; GO:0003924 GTPase activity; GO:0005488 binding; GO:0005515 protein binding; GO:0005525 GTP binding; GO:0008092 cytoskeletal protein binding; GO:0016462 pyrophosphatase activity; GO:0016787 hydrolase activity; GO:0016817 hydrolase activity, acting on acid anhydrides; G…	PF00071	Ras family	U	KOG0393	Ras-related small GTPase, Rho type
P08910	57	K	0.151	0.0195964	Down	Monoacylglycerol lipase ABHD2 OS=Homo sapiens OX=9606 GN=ABHD2 PE=1 SV=1	ABHD2	1	1.21256e-06	168.69	2	FLLK(1)SCPLLTK	-1.8294	3.13		3.765	3.789		0.274	1.551	0.246	0.079		extracellular	K13697			GO:0000003 reproduction; GO:0003006 developmental process involved in reproduction; GO:0006629 lipid metabolic process; GO:0006638 neutral lipid metabolic process; GO:0006639 acylglycerol metabolic process; GO:0006950 response to stress; GO:0007154 cell communication; GO:0007165 signal transduction; GO:0007276 gamete generation; GO:0007281 germ cell development; GO:0007283 spermatogenesis; GO:000…	GO:0001669 acrosomal vesicle; GO:0005622 intracellular; GO:0005623 cell; GO:0005737 cytoplasm; GO:0005886 plasma membrane; GO:0005929 cilium; GO:0012505 endomembrane system; GO:0016020 membrane; GO:0030141 secretory granule; GO:0031410 cytoplasmic vesicle; GO:0031514 motile cilium; GO:0031982 vesicle; GO:0036126 sperm flagellum; GO:0042995 cell projection; GO:0043226 organelle; GO:0043227 membran…	GO:0003707 steroid hormone receptor activity; GO:0003824 catalytic activity; GO:0005488 binding; GO:0016298 lipase activity; GO:0016787 hydrolase activity; GO:0016788 hydrolase activity, acting on ester bonds; GO:0038023 signaling receptor activity; GO:0042562 hormone binding; GO:0047372 acylglycerol lipase activity; GO:0052689 carboxylic ester hydrolase activity; GO:0060089 molecular transducer …	PF00561	alpha/beta hydrolase fold	S	KOG1838	Alpha/beta hydrolase
P62979	48	K	0.301	0.0420823	Down	Ubiquitin-40S ribosomal protein S27a OS=Homo sapiens OX=9606 GN=RPS27A PE=1 SV=2	RPS27A	1	1.41653e-75	246.5	2	LIFAGK(1)QLEDGR	2.0356	2.228	1.145	1.326	1.008	2.148	0.73	0.025	0.88	0.036	0.692	extracellular	K02977	RP-S27Ae; ubiquitin-small subunit ribosomal protein S27Ae	hsa04137 Mitophagy - animal; hsa05167 Kaposi sarcoma-associated herpesvirus infection; hsa05022 Pathways of neurodegeneration - multiple diseases; hsa04120 Ubiquitin mediated proteolysis; hsa03010 Ribosome; hsa05171 Coronavirus disease - COVID-19; hsa05131 Shigellosis; hsa05012 Parkinson disease	GO:0000122 negative regulation of transcription by RNA polymerase II; GO:0000165 MAPK cascade; GO:0000184 nuclear-transcribed mRNA catabolic process, nonsense-mediated decay; GO:0000187 activation of MAPK activity; GO:0000209 protein polyubiquitination; GO:0000715 nucleotide-excision repair, DNA damage recognition; GO:0000731 DNA synthesis involved in DNA repair; GO:0000956 nuclear-transcribed mR…	GO:0005622 intracellular; GO:0005623 cell; GO:0005634 nucleus; GO:0005654 nucleoplasm; GO:0005737 cytoplasm; GO:0005739 mitochondrion; GO:0005740 mitochondrial envelope; GO:0005741 mitochondrial outer membrane; GO:0005768 endosome; GO:0005783 endoplasmic reticulum; GO:0005789 endoplasmic reticulum membrane; GO:0005829 cytosol; GO:0005840 ribosome; GO:0005886 plasma membrane; GO:0010008 endosome m…		PF00240; PF01599	Ubiquitin family; Ribosomal protein S27a	J	KOG0004	Ubiquitin/40S ribosomal protein S27a fusion
P10644	261	K	0.295	0.0228824	Down	cAMP-dependent protein kinase type I-alpha regulatory subunit OS=Homo sapiens OX=9606 GN=PRKAR1A PE=1 SV=1	PRKAR1A	1	1.28313e-40	215.79	2	VSILESLDK(1)WER	-5.4977	1.712	0.382	1.053	1.956	2.358	0.387	0.585	0.577	0.156	0.497	nucleus	K04739	PRKAR; cAMP-dependent protein kinase regulator	hsa04910 Insulin signaling pathway	GO:0000003 reproduction; GO:0000280 nuclear division; GO:0001704 formation of primary germ layer; GO:0001707 mesoderm formation; GO:0001932 regulation of protein phosphorylation; GO:0001933 negative regulation of protein phosphorylation; GO:0001934 positive regulation of protein phosphorylation; GO:0002682 regulation of immune system process; GO:0002683 negative regulation of immune system proces…	GO:0005622 intracellular; GO:0005623 cell; GO:0005737 cytoplasm; GO:0005829 cytosol; GO:0005886 plasma membrane; GO:0005929 cilium; GO:0005952 cAMP-dependent protein kinase complex; GO:0016020 membrane; GO:0031588 nucleotide-activated protein kinase complex; GO:0031594 neuromuscular junction; GO:0032991 protein-containing complex; GO:0042995 cell projection; GO:0043226 organelle; GO:0044853 plasm…	GO:0000166 nucleotide binding; GO:0004857 enzyme inhibitor activity; GO:0004860 protein kinase inhibitor activity; GO:0004862 cAMP-dependent protein kinase inhibitor activity; GO:0005488 binding; GO:0005515 protein binding; GO:0008603 cAMP-dependent protein kinase regulator activity; GO:0017076 purine nucleotide binding; GO:0019207 kinase regulator activity; GO:0019210 kinase inhibitor activity; …	PF02197; PF00027	Regulatory subunit of type II PKA R-subunit; Cyclic nucleotide-binding domain	T	KOG1113	cAMP-dependent protein kinase types I and II, regulatory subunit
P11166	256	K	0.417	0.0321432	Down	Solute carrier family 2, facilitated glucose transporter member 1 OS=Homo sapiens OX=9606 GN=SLC2A1 PE=1 SV=2	SLC2A1	1	0.000340745	114.39	2	K(1)VTILELFR	-1.1585	3.889	1.245	2.027	2.04	1.099	0.769	0.962	1.235		0.468	plasma membrane	K07299	SLC2A1; MFS transporter, SP family, solute carrier family 2 (facilitated glucose transporter), member 1	hsa05211 Renal cell carcinoma; hsa04976 Bile secretion; hsa04919 Thyroid hormone signaling pathway; hsa05166 Human T-cell leukemia virus 1 infection; hsa05200 Pathways in cancer; hsa05415 Diabetic cardiomyopathy; hsa04911 Insulin secretion; hsa04066 HIF-1 signaling pathway; hsa04922 Glucagon signaling pathway; hsa04920 Adipocytokine signaling pathway; hsa05230 Central carbon metabolism in cancer;…	GO:0000003 reproduction; GO:0002791 regulation of peptide secretion; GO:0005975 carbohydrate metabolic process; GO:0005984 disaccharide metabolic process; GO:0005988 lactose metabolic process; GO:0005989 lactose biosynthetic process; GO:0005996 monosaccharide metabolic process; GO:0006082 organic acid metabolic process; GO:0006732 coenzyme metabolic process; GO:0006766 vitamin metabolic process; …	GO:0000139 Golgi membrane; GO:0001939 female pronucleus; GO:0005622 intracellular; GO:0005623 cell; GO:0005634 nucleus; GO:0005737 cytoplasm; GO:0005794 Golgi apparatus; GO:0005829 cytosol; GO:0005856 cytoskeleton; GO:0005886 plasma membrane; GO:0005887 integral component of plasma membrane; GO:0005901 caveola; GO:0005911 cell-cell junction; GO:0005938 cell cortex; GO:0012505 endomembrane system;…	GO:0005215 transporter activity; GO:0005355 glucose transmembrane transporter activity; GO:0005488 binding; GO:0005515 protein binding; GO:0008509 anion transmembrane transporter activity; GO:0008514 organic anion transmembrane transporter activity; GO:0015075 ion transmembrane transporter activity; GO:0015144 carbohydrate transmembrane transporter activity; GO:0015145 monosaccharide transmembran…			P	KOG0569	Permease of the major facilitator superfamily
P11171	366	K	0.231	0.000474418	Down	Protein 4.1 OS=Homo sapiens OX=9606 GN=EPB41 PE=1 SV=4	EPB41	1	4.03164e-31	203.52	2	ELEEK(1)VMELHK	-2.2229	1.299				1.291	0.308				0.289	nucleus	K06107			GO:0006996 organelle organization; GO:0007010 cytoskeleton organization; GO:0008360 regulation of cell shape; GO:0009987 cellular process; GO:0016043 cellular component organization; GO:0022603 regulation of anatomical structure morphogenesis; GO:0022604 regulation of cell morphogenesis; GO:0022607 cellular component assembly; GO:0030029 actin filament-based process; GO:0030036 actin cytoskeleton…	GO:0005622 intracellular; GO:0005623 cell; GO:0005737 cytoplasm; GO:0005829 cytosol; GO:0005856 cytoskeleton; GO:0005886 plasma membrane; GO:0005938 cell cortex; GO:0009898 cytoplasmic side of plasma membrane; GO:0014069 postsynaptic density; GO:0014731 spectrin-associated cytoskeleton; GO:0015629 actin cytoskeleton; GO:0016020 membrane; GO:0030054 cell junction; GO:0030863 cortical cytoskeleton;…	GO:0003779 actin binding; GO:0005198 structural molecule activity; GO:0005200 structural constituent of cytoskeleton; GO:0005488 binding; GO:0005515 protein binding; GO:0005543 phospholipid binding; GO:0005545 1-phosphatidylinositol binding; GO:0008022 protein C-terminus binding; GO:0008092 cytoskeletal protein binding; GO:0008289 lipid binding; GO:0030507 spectrin binding; GO:0035091 phosphatidy…	PF09379; PF00373; PF09380; PF04382; PF05902	FERM N-terminal domain ; FERM central domain; FERM C-terminal PH-like domain; SAB domain; 4.1 protein C-terminal domain (CTD)	Z	KOG3530	FERM domain protein EHM2
P16615	712	K	0.343	0.0185715	Down	Sarcoplasmic/endoplasmic reticulum calcium ATPase 2 OS=Homo sapiens OX=9606 GN=ATP2A2 PE=1 SV=1	ATP2A2	1	9.60186e-16	155.34	2	K(1)AEIGIAMGSGTAVAK	-0.70584	2.742			1.134	1.71	0.686	0.672			0.556	plasma membrane	K05853	ATP2A; P-type Ca2+ transporter type 2A [EC:7.2.2.10]	hsa05410 Hypertrophic cardiomyopathy; hsa04972 Pancreatic secretion; hsa05017 Spinocerebellar ataxia; hsa05412 Arrhythmogenic right ventricular cardiomyopathy; hsa04020 Calcium signaling pathway; hsa04919 Thyroid hormone signaling pathway; hsa05415 Diabetic cardiomyopathy; hsa04261 Adrenergic signaling in cardiomyocytes; hsa05010 Alzheimer disease; hsa04260 Cardiac muscle contraction; hsa04024 cA…	GO:0001505 regulation of neurotransmitter levels; GO:0002026 regulation of the force of heart contraction; GO:0002027 regulation of heart rate; GO:0002237 response to molecule of bacterial origin; GO:0003008 system process; GO:0003012 muscle system process; GO:0003299 muscle hypertrophy in response to stress; GO:0003300 cardiac muscle hypertrophy; GO:0006810 transport; GO:0006811 ion transport; G…	GO:0005622 intracellular; GO:0005623 cell; GO:0005634 nucleus; GO:0005654 nucleoplasm; GO:0005737 cytoplasm; GO:0005783 endoplasmic reticulum; GO:0005789 endoplasmic reticulum membrane; GO:0005886 plasma membrane; GO:0005887 integral component of plasma membrane; GO:0009898 cytoplasmic side of plasma membrane; GO:0012505 endomembrane system; GO:0012506 vesicle membrane; GO:0014801 longitudinal sa…	GO:0000166 nucleotide binding; GO:0001664 G protein-coupled receptor binding; GO:0003824 catalytic activity; GO:0005102 signaling receptor binding; GO:0005215 transporter activity; GO:0005388 calcium transmembrane transporter activity, phosphorylative mechanism; GO:0005488 binding; GO:0005509 calcium ion binding; GO:0005515 protein binding; GO:0005524 ATP binding; GO:0008022 protein C-terminus bi…	PF00690; PF08282	Cation transporter/ATPase, N-terminus; haloacid dehalogenase-like hydrolase	P	KOG0202	Ca2+ transporting ATPase
P17980	245	K	0.222	0.00104134	Down	26S proteasome regulatory subunit 6A OS=Homo sapiens OX=9606 GN=PSMC3 PE=1 SV=3	PSMC3	0.999998	2.43988e-05	138.23	2	ACAAQTK(1)ATFLK	-0.58517	2.427	1.341	0.939		1.146	0.38	0.342	0.368	0.209		cytoplasm	K03065	PSMC3; 26S proteasome regulatory subunit T5	hsa05017 Spinocerebellar ataxia; hsa05016 Huntington disease; hsa03050 Proteasome; hsa05169 Epstein-Barr virus infection; hsa05012 Parkinson disease; hsa05010 Alzheimer disease; hsa05022 Pathways of neurodegeneration - multiple diseases; hsa05014 Amyotrophic lateral sclerosis; hsa05020 Prion disease	GO:0001775 cell activation; GO:0002252 immune effector process; GO:0002263 cell activation involved in immune response; GO:0002274 myeloid leukocyte activation; GO:0002275 myeloid cell activation involved in immune response; GO:0002283 neutrophil activation involved in immune response; GO:0002366 leukocyte activation involved in immune response; GO:0002376 immune system process; GO:0002443 leukoc…	GO:0000502 proteasome complex; GO:0000932 P-body; GO:0005576 extracellular region; GO:0005622 intracellular; GO:0005623 cell; GO:0005634 nucleus; GO:0005654 nucleoplasm; GO:0005737 cytoplasm; GO:0005829 cytosol; GO:0005838 proteasome regulatory particle; GO:0008540 proteasome regulatory particle, base subcomplex; GO:0012505 endomembrane system; GO:0022624 proteasome accessory complex; GO:0030141 …	GO:0003824 catalytic activity; GO:0005488 binding; GO:0005515 protein binding; GO:0008134 transcription factor binding; GO:0016462 pyrophosphatase activity; GO:0016787 hydrolase activity; GO:0016817 hydrolase activity, acting on acid anhydrides; GO:0016818 hydrolase activity, acting on acid anhydrides, in phosphorus-containing anhydrides; GO:0016887 ATPase activity; GO:0017025 TBP-class protein b…	PF00004	ATPase family associated with various cellular activities (AAA)	O	KOG0652	26S proteasome regulatory complex, ATPase RPT5
P20700	182	K	0.33	0.0426202	Down	Lamin-B1 OS=Homo sapiens OX=9606 GN=LMNB1 PE=1 SV=2	LMNB1	1	2.78724e-05	113.46	2	K(1)QLADETLLK	-0.097488	2.028				2.565	0.586	0.351		0.845	1.247	nucleus	K07611	LMNB; lamin B	hsa04210 Apoptosis	GO:0001932 regulation of protein phosphorylation; GO:0001934 positive regulation of protein phosphorylation; GO:0006915 apoptotic process; GO:0007154 cell communication; GO:0007165 signal transduction; GO:0007166 cell surface receptor signaling pathway; GO:0007275 multicellular organism development; GO:0007346 regulation of mitotic cell cycle; GO:0007399 nervous system development; GO:0008219 cel…	GO:0005622 intracellular; GO:0005623 cell; GO:0005634 nucleus; GO:0005635 nuclear envelope; GO:0005637 nuclear inner membrane; GO:0005638 lamin filament; GO:0005652 nuclear lamina; GO:0005654 nucleoplasm; GO:0005737 cytoplasm; GO:0005856 cytoskeleton; GO:0005882 intermediate filament; GO:0012505 endomembrane system; GO:0016020 membrane; GO:0016363 nuclear matrix; GO:0019866 organelle inner membra…	GO:0005198 structural molecule activity; GO:0005488 binding; GO:0005515 protein binding; GO:0008432 JUN kinase binding; GO:0019899 enzyme binding; GO:0019900 kinase binding; GO:0019901 protein kinase binding; GO:0043274 phospholipase binding;	PF00932	Lamin Tail Domain	DY	KOG0977	Nuclear envelope protein lamin, intermediate filament superfamily
P23246	413	K	0.423	0.0376451	Down	Splicing factor, proline- and glutamine-rich OS=Homo sapiens OX=9606 GN=SFPQ PE=1 SV=2	SFPQ	1	2.55192e-07	157.74	2	STGK(1)GIVEFASK	2.3596	3.495	1.315	0.859		1.375	0.934	0.924	0.626	0.726	0.515	nucleus	K13219			GO:0000122 negative regulation of transcription by RNA polymerase II; GO:0000375 RNA splicing, via transesterification reactions; GO:0000377 RNA splicing, via transesterification reactions with bulged adenosine as nucleophile; GO:0000380 alternative mRNA splicing, via spliceosome; GO:0000398 mRNA splicing, via spliceosome; GO:0000724 double-strand break repair via homologous recombination; GO:000…	GO:0000785 chromatin; GO:0005622 intracellular; GO:0005623 cell; GO:0005634 nucleus; GO:0005654 nucleoplasm; GO:0005667 transcription regulator complex; GO:0005694 chromosome; GO:0016363 nuclear matrix; GO:0016604 nuclear body; GO:0031974 membrane-enclosed lumen; GO:0031981 nuclear lumen; GO:0032991 protein-containing complex; GO:0034399 nuclear periphery; GO:0042382 paraspeckles; GO:0043226 orga…	GO:0000976 transcription regulatory region sequence-specific DNA binding; GO:0000977 RNA polymerase II transcription regulatory region sequence-specific DNA binding; GO:0000978 RNA polymerase II cis-regulatory region sequence-specific DNA binding; GO:0000987 cis-regulatory region sequence-specific DNA binding; GO:0001067 regulatory region nucleic acid binding; GO:0003676 nucleic acid binding; GO:…	PF00076; PF08075	RNA recognition motif. (a.k.a. RRM, RBD, or RNP domain); NOPS (NUC059) domain	A	KOG0115	RNA-binding protein p54nrb (RRM superfamily)
P23458	249	K	0.56	0.0269054	Down	Tyrosine-protein kinase JAK1 OS=Homo sapiens OX=9606 GN=JAK1 PE=1 SV=2	JAK1	1	4.44885e-09	137.84	2	DFLK(1)EFNNK	-1.041	1.913	0.852	1.477		1.168	0.595	0.973	0.974	0.685	0.559	cytoplasm	K11217	JAK1; Janus kinase 1 [EC:2.7.10.2]	hsa04380 Osteoclast differentiation; hsa05160 Hepatitis C; hsa01521 EGFR tyrosine kinase inhibitor resistance; hsa05161 Hepatitis B; hsa05203 Viral carcinogenesis; hsa05166 Human T-cell leukemia virus 1 infection; hsa05200 Pathways in cancer; hsa05169 Epstein-Barr virus infection; hsa04621 NOD-like receptor signaling pathway; hsa05168 Herpes simplex virus 1 infection; hsa05165 Human papillomaviru…	GO:0000165 MAPK cascade; GO:0001959 regulation of cytokine-mediated signaling pathway; GO:0002376 immune system process; GO:0002682 regulation of immune system process; GO:0006464 cellular protein modification process; GO:0006468 protein phosphorylation; GO:0006793 phosphorus metabolic process; GO:0006796 phosphate-containing compound metabolic process; GO:0006807 nitrogen compound metabolic proc…	GO:0005622 intracellular; GO:0005623 cell; GO:0005634 nucleus; GO:0005737 cytoplasm; GO:0005768 endosome; GO:0005829 cytosol; GO:0005886 plasma membrane; GO:0009898 cytoplasmic side of plasma membrane; GO:0012505 endomembrane system; GO:0016020 membrane; GO:0019897 extrinsic component of plasma membrane; GO:0019898 extrinsic component of membrane; GO:0031234 extrinsic component of cytoplasmic sid…	GO:0001664 G protein-coupled receptor binding; GO:0003824 catalytic activity; GO:0004672 protein kinase activity; GO:0004713 protein tyrosine kinase activity; GO:0004715 non-membrane spanning protein tyrosine kinase activity; GO:0005085 guanyl-nucleotide exchange factor activity; GO:0005088 Ras guanyl-nucleotide exchange factor activity; GO:0005102 signaling receptor binding; GO:0005126 cytokine …	PF07714	Protein tyrosine kinase	T	KOG0197	Tyrosine kinases
Q16778	47	K	0.334	0.00591845	Down	Histone H2B type 2-E OS=Homo sapiens OX=9606 GN=H2BC21 PE=1 SV=3	H2BC21	1	9.73253e-18	172.92	2	VLK(1)QVHPDTGISSK	-0.97973	4.317	1.926	1.184	1.145	1.993	0.612	0.809	0.824	0.832	0.448	nucleus	K11252	H2B; histone H2B	hsa05322 Systemic lupus erythematosus; hsa04613 Neutrophil extracellular trap formation; hsa05203 Viral carcinogenesis; hsa05034 Alcoholism	GO:0002227 innate immune response in mucosa; GO:0002251 organ or tissue specific immune response; GO:0002376 immune system process; GO:0002385 mucosal immune response; GO:0006323 DNA packaging; GO:0006325 chromatin organization; GO:0006333 chromatin assembly or disassembly; GO:0006334 nucleosome assembly; GO:0006950 response to stress; GO:0006952 defense response; GO:0006955 immune response; GO:0…	GO:0000785 chromatin; GO:0000786 nucleosome; GO:0005576 extracellular region; GO:0005615 extracellular space; GO:0005622 intracellular; GO:0005623 cell; GO:0005634 nucleus; GO:0005654 nucleoplasm; GO:0005694 chromosome; GO:0005737 cytoplasm; GO:0005829 cytosol; GO:0031974 membrane-enclosed lumen; GO:0031981 nuclear lumen; GO:0032991 protein-containing complex; GO:0032993 protein-DNA complex; GO:0…	GO:0003676 nucleic acid binding; GO:0003677 DNA binding; GO:0005488 binding; GO:0097159 organic cyclic compound binding; GO:1901363 heterocyclic compound binding;	PF00125	Core histone H2A/H2B/H3/H4	B	KOG1744	Histone H2B
P25686	34	K	0.325	0.00858154	Down	DnaJ homolog subfamily B member 2 OS=Homo sapiens OX=9606 GN=DNAJB2 PE=1 SV=3	DNAJB2	0.999986	1.01295e-10	153.25	2	ALQWHPDK(1)NPDNK	9.3955	2.383	2.32	0.914	0.678	1.137	0.405	0.511	0.637	0.61	0.249	nucleus	K09508	DNAJB2; DnaJ homolog subfamily B member 2	hsa04141 Protein processing in endoplasmic reticulum	GO:0001558 regulation of cell growth; GO:0006457 protein folding; GO:0006508 proteolysis; GO:0006511 ubiquitin-dependent protein catabolic process; GO:0006807 nitrogen compound metabolic process; GO:0006950 response to stress; GO:0006986 response to unfolded protein; GO:0008152 metabolic process; GO:0008285 negative regulation of cell population proliferation; GO:0009056 catabolic process; GO:000…	GO:0005622 intracellular; GO:0005623 cell; GO:0005634 nucleus; GO:0005635 nuclear envelope; GO:0005737 cytoplasm; GO:0005783 endoplasmic reticulum; GO:0005789 endoplasmic reticulum membrane; GO:0005829 cytosol; GO:0012505 endomembrane system; GO:0016020 membrane; GO:0016234 inclusion body; GO:0019898 extrinsic component of membrane; GO:0031090 organelle membrane; GO:0031224 intrinsic component of…	GO:0001671 ATPase activator activity; GO:0005488 binding; GO:0005515 protein binding; GO:0008047 enzyme activator activity; GO:0019899 enzyme binding; GO:0030234 enzyme regulator activity; GO:0030544 Hsp70 protein binding; GO:0031072 heat shock protein binding; GO:0031593 polyubiquitin modification-dependent protein binding; GO:0031625 ubiquitin protein ligase binding; GO:0032182 ubiquitin-like p…	PF00226	DnaJ domain	O	KOG0714	Molecular chaperone (DnaJ superfamily)
P25686	47	K	0.532	0.0482073	Down	DnaJ homolog subfamily B member 2 OS=Homo sapiens OX=9606 GN=DNAJB2 PE=1 SV=3	DNAJB2	1	7.14716e-10	117.41	2	FK(1)EVAEAYEVLSDK	-3.6128	1.684	2.158	0.959	0.866	0.835	0.563	0.798	1.081	0.652	0.367	nucleus	K09508	DNAJB2; DnaJ homolog subfamily B member 2	hsa04141 Protein processing in endoplasmic reticulum	GO:0001558 regulation of cell growth; GO:0006457 protein folding; GO:0006508 proteolysis; GO:0006511 ubiquitin-dependent protein catabolic process; GO:0006807 nitrogen compound metabolic process; GO:0006950 response to stress; GO:0006986 response to unfolded protein; GO:0008152 metabolic process; GO:0008285 negative regulation of cell population proliferation; GO:0009056 catabolic process; GO:000…	GO:0005622 intracellular; GO:0005623 cell; GO:0005634 nucleus; GO:0005635 nuclear envelope; GO:0005737 cytoplasm; GO:0005783 endoplasmic reticulum; GO:0005789 endoplasmic reticulum membrane; GO:0005829 cytosol; GO:0012505 endomembrane system; GO:0016020 membrane; GO:0016234 inclusion body; GO:0019898 extrinsic component of membrane; GO:0031090 organelle membrane; GO:0031224 intrinsic component of…	GO:0001671 ATPase activator activity; GO:0005488 binding; GO:0005515 protein binding; GO:0008047 enzyme activator activity; GO:0019899 enzyme binding; GO:0030234 enzyme regulator activity; GO:0030544 Hsp70 protein binding; GO:0031072 heat shock protein binding; GO:0031593 polyubiquitin modification-dependent protein binding; GO:0031625 ubiquitin protein ligase binding; GO:0032182 ubiquitin-like p…	PF00226	DnaJ domain	O	KOG0714	Molecular chaperone (DnaJ superfamily)
P30740	87	K	0.453	0.0447356	Down	Leukocyte elastase inhibitor OS=Homo sapiens OX=9606 GN=SERPINB1 PE=1 SV=1	SERPINB1	1	8.62219e-05	105.36	2	GASYILK(1)LANR	2.7111	2.282		0.698	1.08	1.341	0.715	1.163	0.402	0.386	0.394	cytoplasm	K23425			GO:0001775 cell activation; GO:0002252 immune effector process; GO:0002263 cell activation involved in immune response; GO:0002274 myeloid leukocyte activation; GO:0002275 myeloid cell activation involved in immune response; GO:0002283 neutrophil activation involved in immune response; GO:0002366 leukocyte activation involved in immune response; GO:0002376 immune system process; GO:0002443 leukoc…	GO:0005576 extracellular region; GO:0005615 extracellular space; GO:0005622 intracellular; GO:0005623 cell; GO:0005737 cytoplasm; GO:0012505 endomembrane system; GO:0030141 secretory granule; GO:0031410 cytoplasmic vesicle; GO:0031974 membrane-enclosed lumen; GO:0031982 vesicle; GO:0031983 vesicle lumen; GO:0034774 secretory granule lumen; GO:0043226 organelle; GO:0043227 membrane-bounded organel…	GO:0004857 enzyme inhibitor activity; GO:0004866 endopeptidase inhibitor activity; GO:0004867 serine-type endopeptidase inhibitor activity; GO:0030234 enzyme regulator activity; GO:0030414 peptidase inhibitor activity; GO:0061134 peptidase regulator activity; GO:0061135 endopeptidase regulator activity; GO:0098772 molecular function regulator;	PF00079	Serpin (serine protease inhibitor)	V	KOG2392	Serpin
P31949	27	K	0.411	0.0369488	Down	Protein S100-A11 OS=Homo sapiens OX=9606 GN=S100A11 PE=1 SV=2	S100A11	1	1.02585e-15	159.44	2	YAGK(1)DGYNYTLSK	-0.35534	1.684	0.652	0.814	0.696	1.38	0.715	0.247			0.327	cytoplasm	K23765			GO:0001775 cell activation; GO:0002252 immune effector process; GO:0002263 cell activation involved in immune response; GO:0002274 myeloid leukocyte activation; GO:0002275 myeloid cell activation involved in immune response; GO:0002283 neutrophil activation involved in immune response; GO:0002366 leukocyte activation involved in immune response; GO:0002376 immune system process; GO:0002443 leukoc…	GO:0001726 ruffle; GO:0005622 intracellular; GO:0005623 cell; GO:0005634 nucleus; GO:0005737 cytoplasm; GO:0012505 endomembrane system; GO:0030141 secretory granule; GO:0031252 cell leading edge; GO:0031410 cytoplasmic vesicle; GO:0031974 membrane-enclosed lumen; GO:0031982 vesicle; GO:0031983 vesicle lumen; GO:0034774 secretory granule lumen; GO:0042995 cell projection; GO:0043226 organelle; GO:…	GO:0005488 binding; GO:0005515 protein binding; GO:0042802 identical protein binding; GO:0042803 protein homodimerization activity; GO:0044548 S100 protein binding; GO:0046983 protein dimerization activity; GO:0048306 calcium-dependent protein binding;	PF01023; PF00036	S-100/ICaBP type calcium binding domain; EF hand
P32119	10	K	0.257	0.0426016	Down	Peroxiredoxin-2 OS=Homo sapiens OX=9606 GN=PRDX2 PE=1 SV=5	PRDX2	0.999999	0.00308505	63.397	2	IGK(1)PAPDFK	0.56731	1.276				1.438	0.167			0.378	0.502	cytoplasm	K03386			GO:0000187 activation of MAPK activity; GO:0000302 response to reactive oxygen species; GO:0000303 response to superoxide; GO:0000305 response to oxygen radical; GO:0001775 cell activation; GO:0001932 regulation of protein phosphorylation; GO:0001934 positive regulation of protein phosphorylation; GO:0002237 response to molecule of bacterial origin; GO:0002252 immune effector process; GO:0002376 …	GO:0005622 intracellular; GO:0005623 cell; GO:0005737 cytoplasm; GO:0005829 cytosol; GO:0043209 myelin sheath;	GO:0003824 catalytic activity; GO:0004601 peroxidase activity; GO:0005488 binding; GO:0008379 thioredoxin peroxidase activity; GO:0008430 selenium binding; GO:0016209 antioxidant activity; GO:0016491 oxidoreductase activity; GO:0016684 oxidoreductase activity, acting on peroxide as acceptor; GO:0051920 peroxiredoxin activity;	PF00578; PF10417	AhpC/TSA family; C-terminal domain of 1-Cys peroxiredoxin	O	KOG0852	Alkyl hydroperoxide reductase, thiol specific antioxidant and related enzymes
P35222	435	K	1.995	0.0387949	Up	Catenin beta-1 OS=Homo sapiens OX=9606 GN=CTNNB1 PE=1 SV=1	CTNNB1	1	2.03363e-07	102.57	2	NK(1)MMVCQVGGIEALVR	-1.1732	0.716	0.701	0.958		0.442			1.428	1.382		cytoplasm,nucleus	K02105	CTNNB1; catenin beta 1	hsa05216 Thyroid cancer; hsa05160 Hepatitis C; hsa04510 Focal adhesion; hsa05224 Breast cancer; hsa05412 Arrhythmogenic right ventricular cardiomyopathy; hsa04919 Thyroid hormone signaling pathway; hsa05200 Pathways in cancer; hsa05418 Fluid shear stress and atherosclerosis; hsa05010 Alzheimer disease; hsa04310 Wnt signaling pathway; hsa05132 Salmonella infection; hsa05225 Hepatocellular carcinom…	GO:0000003 reproduction; GO:0000122 negative regulation of transcription by RNA polymerase II; GO:0000226 microtubule cytoskeleton organization; GO:0000578 embryonic axis specification; GO:0000902 cell morphogenesis; GO:0000904 cell morphogenesis involved in differentiation; GO:0001501 skeletal system development; GO:0001525 angiogenesis; GO:0001568 blood vessel development; GO:0001569 branching …	GO:0000228 nuclear chromosome; GO:0000785 chromatin; GO:0000790 nuclear chromatin; GO:0000791 euchromatin; GO:0005622 intracellular; GO:0005623 cell; GO:0005634 nucleus; GO:0005635 nuclear envelope; GO:0005654 nucleoplasm; GO:0005667 transcription regulator complex; GO:0005694 chromosome; GO:0005719 nuclear euchromatin; GO:0005737 cytoplasm; GO:0005813 centrosome; GO:0005815 microtubule organizin…	GO:0001085 RNA polymerase II transcription factor binding; GO:0001102 RNA polymerase II activating transcription factor binding; GO:0003682 chromatin binding; GO:0003700 DNA-binding transcription factor activity; GO:0003712 transcription coregulator activity; GO:0003713 transcription coactivator activity; GO:0005102 signaling receptor binding; GO:0005488 binding; GO:0005515 protein binding; GO:00…			K	KOG4203	Armadillo/beta-Catenin/plakoglobin
P43243	146	K	0.556	0.0185668	Down	Matrin-3 OS=Homo sapiens OX=9606 GN=MATR3 PE=1 SV=2	MATR3	1	0.000707297	74.524	3	ITPENLPQILLQLK(1)R	-1.515	1.615				1.379		0.846	0.818			nucleus	K13213	MATR3; matrin 3	hsa05014 Amyotrophic lateral sclerosis	GO:0002218 activation of innate immune response; GO:0002253 activation of immune response; GO:0002376 immune system process; GO:0002682 regulation of immune system process; GO:0002684 positive regulation of immune system process; GO:0003170 heart valve development; GO:0003205 cardiac chamber development; GO:0003231 cardiac ventricle development; GO:0003279 cardiac septum development; GO:0003281 v…	GO:0005622 intracellular; GO:0005623 cell; GO:0005634 nucleus; GO:0005635 nuclear envelope; GO:0005637 nuclear inner membrane; GO:0005737 cytoplasm; GO:0012505 endomembrane system; GO:0016020 membrane; GO:0016363 nuclear matrix; GO:0019866 organelle inner membrane; GO:0031090 organelle membrane; GO:0031965 nuclear membrane; GO:0031967 organelle envelope; GO:0031974 membrane-enclosed lumen; GO:003…	GO:0003676 nucleic acid binding; GO:0003723 RNA binding; GO:0005198 structural molecule activity; GO:0005488 binding; GO:0005515 protein binding; GO:0035198 miRNA binding; GO:0042802 identical protein binding; GO:0061980 regulatory RNA binding; GO:0097159 organic cyclic compound binding; GO:1901363 heterocyclic compound binding;	PF13893	RNA recognition motif. (a.k.a. RRM, RBD, or RNP domain)
P46459	728	K	0.132	0.0403203	Down	Vesicle-fusing ATPase OS=Homo sapiens OX=9606 GN=NSF PE=1 SV=3	NSF	1	0.00786053	105.22	2	K(1)FLALLR	-0.87646	3.309	3.007	0.942			0.396		0.243			cytoplasm	K06027	NSF; vesicle-fusing ATPase [EC:3.6.4.6]	hsa04721 Synaptic vesicle cycle; hsa04962 Vasopressin-regulated water reabsorption; hsa04727 GABAergic synapse	GO:0001505 regulation of neurotransmitter levels; GO:0001919 regulation of receptor recycling; GO:0001921 positive regulation of receptor recycling; GO:0002090 regulation of receptor internalization; GO:0006810 transport; GO:0006811 ion transport; GO:0006812 cation transport; GO:0006813 potassium ion transport; GO:0006836 neurotransmitter transport; GO:0006886 intracellular protein transport; GO:…	GO:0005622 intracellular; GO:0005623 cell; GO:0005737 cytoplasm; GO:0005794 Golgi apparatus; GO:0005795 Golgi stack; GO:0005829 cytosol; GO:0005886 plasma membrane; GO:0012505 endomembrane system; GO:0014069 postsynaptic density; GO:0016020 membrane; GO:0030425 dendrite; GO:0030496 midbody; GO:0031984 organelle subcompartment; GO:0032279 asymmetric synapse; GO:0036477 somatodendritic compartment;…	GO:0000149 SNARE binding; GO:0001664 G protein-coupled receptor binding; GO:0003824 catalytic activity; GO:0005102 signaling receptor binding; GO:0005488 binding; GO:0005515 protein binding; GO:0008022 protein C-terminus binding; GO:0016462 pyrophosphatase activity; GO:0016787 hydrolase activity; GO:0016817 hydrolase activity, acting on acid anhydrides; GO:0016818 hydrolase activity, acting on ac…	PF02359; PF02933; PF00004	Cell division protein 48 (CDC48), N-terminal domain; Cell division protein 48 (CDC48), domain 2; ATPase family associated with various cellular activities (AAA)	U	KOG0741	AAA+-type ATPase
P46821	1858	K	0.363	0.047472	Down	Microtubule-associated protein 1B OS=Homo sapiens OX=9606 GN=MAP1B PE=1 SV=2	MAP1B	0.99806	1.37435e-07	128.97	2	DLSTPGLEK(0.998)DSGGK(0.002)	0.15249	1.092	1.603		0.641	1.419	0.811	0.107	0.285	0.525		nucleus	K10429			GO:0000226 microtubule cytoskeleton organization; GO:0000902 cell morphogenesis; GO:0000904 cell morphogenesis involved in differentiation; GO:0001558 regulation of cell growth; GO:0001578 microtubule bundle formation; GO:0001764 neuron migration; GO:0006810 transport; GO:0006928 movement of cell or subcellular component; GO:0006950 response to stress; GO:0006996 organelle organization; GO:000701…	GO:0001750 photoreceptor outer segment; GO:0005622 intracellular; GO:0005623 cell; GO:0005737 cytoplasm; GO:0005829 cytosol; GO:0005856 cytoskeleton; GO:0005874 microtubule; GO:0005875 microtubule associated complex; GO:0005886 plasma membrane; GO:0005929 cilium; GO:0014069 postsynaptic density; GO:0015630 microtubule cytoskeleton; GO:0016020 membrane; GO:0030424 axon; GO:0030425 dendrite; GO:003…	GO:0003779 actin binding; GO:0005198 structural molecule activity; GO:0005488 binding; GO:0005515 protein binding; GO:0005519 cytoskeletal regulatory protein binding; GO:0005543 phospholipid binding; GO:0008017 microtubule binding; GO:0008092 cytoskeletal protein binding; GO:0008289 lipid binding; GO:0015631 tubulin binding; GO:0043167 ion binding; GO:0043168 anion binding; GO:0044877 protein-con…			Z	KOG3592	Microtubule-associated proteins
P49447	225	K	0.455	0.0476454	Down	Transmembrane ascorbate-dependent reductase CYB561 OS=Homo sapiens OX=9606 GN=CYB561 PE=1 SV=2	CYB561	1	1.06814e-10	118.64	3	ADWK(1)RPSQAEEQALSMDFK	-0.51488	0.841	1.197	1.207	2.045	1.173		0.127	1.528	0.412	0.287	plasma membrane	K08360			GO:0006091 generation of precursor metabolites and energy; GO:0008152 metabolic process; GO:0009987 cellular process; GO:0022900 electron transport chain; GO:0044237 cellular metabolic process; GO:0055114 oxidation-reduction process;	GO:0000323 lytic vacuole; GO:0005622 intracellular; GO:0005623 cell; GO:0005737 cytoplasm; GO:0005764 lysosome; GO:0005765 lysosomal membrane; GO:0005773 vacuole; GO:0005774 vacuolar membrane; GO:0012505 endomembrane system; GO:0012506 vesicle membrane; GO:0016020 membrane; GO:0016021 integral component of membrane; GO:0030133 transport vesicle; GO:0030658 transport vesicle membrane; GO:0030659 c…	GO:0000293 ferric-chelate reductase activity; GO:0003824 catalytic activity; GO:0016491 oxidoreductase activity; GO:0016722 oxidoreductase activity, oxidizing metal ions; GO:0016723 oxidoreductase activity, oxidizing metal ions, NAD or NADP as acceptor;			C	KOG1619	Cytochrome b
P49447	240	K	0.405	0.0479007	Down	Transmembrane ascorbate-dependent reductase CYB561 OS=Homo sapiens OX=9606 GN=CYB561 PE=1 SV=2	CYB561	1	9.42574e-122	265.16	3	RPSQAEEQALSMDFK(1)TLTEGDSPGSQ	3.7767	2.382	0.905	1.091	1.16	1.157	0.039	0.218	1.7	0.463	0.294	plasma membrane	K08360			GO:0006091 generation of precursor metabolites and energy; GO:0008152 metabolic process; GO:0009987 cellular process; GO:0022900 electron transport chain; GO:0044237 cellular metabolic process; GO:0055114 oxidation-reduction process;	GO:0000323 lytic vacuole; GO:0005622 intracellular; GO:0005623 cell; GO:0005737 cytoplasm; GO:0005764 lysosome; GO:0005765 lysosomal membrane; GO:0005773 vacuole; GO:0005774 vacuolar membrane; GO:0012505 endomembrane system; GO:0012506 vesicle membrane; GO:0016020 membrane; GO:0016021 integral component of membrane; GO:0030133 transport vesicle; GO:0030658 transport vesicle membrane; GO:0030659 c…	GO:0000293 ferric-chelate reductase activity; GO:0003824 catalytic activity; GO:0016491 oxidoreductase activity; GO:0016722 oxidoreductase activity, oxidizing metal ions; GO:0016723 oxidoreductase activity, oxidizing metal ions, NAD or NADP as acceptor;			C	KOG1619	Cytochrome b
P49961	5	K	0.467	0.0445459	Down	Ectonucleoside triphosphate diphosphohydrolase 1 OS=Homo sapiens OX=9606 GN=ENTPD1 PE=1 SV=1	ENTPD1	0.999997	2.2456e-07	133.76	2	MEDTK(1)ESNVK	9.7258	1.541	0.937	2.196		0.862	0.634	0.698		0.728	0.524	plasma membrane	K01510	ENTPD1_3_8; apyrase [EC:3.6.1.5]	hsa00240 Pyrimidine metabolism; hsa05169 Epstein-Barr virus infection; hsa00230 Purine metabolism; hsa01100 Metabolic pathways	GO:0001101 response to acid chemical; GO:0001775 cell activation; GO:0002237 response to molecule of bacterial origin; GO:0006139 nucleobase-containing compound metabolic process; GO:0006140 regulation of nucleotide metabolic process; GO:0006725 cellular aromatic compound metabolic process; GO:0006753 nucleoside phosphate metabolic process; GO:0006793 phosphorus metabolic process; GO:0006796 phos…	GO:0005576 extracellular region; GO:0005604 basement membrane; GO:0005615 extracellular space; GO:0005622 intracellular; GO:0005623 cell; GO:0005737 cytoplasm; GO:0005886 plasma membrane; GO:0005887 integral component of plasma membrane; GO:0008021 synaptic vesicle; GO:0009986 cell surface; GO:0012505 endomembrane system; GO:0014069 postsynaptic density; GO:0016020 membrane; GO:0016021 integral c…	GO:0003824 catalytic activity; GO:0005488 binding; GO:0005515 protein binding; GO:0016462 pyrophosphatase activity; GO:0016787 hydrolase activity; GO:0016817 hydrolase activity, acting on acid anhydrides; GO:0016818 hydrolase activity, acting on acid anhydrides, in phosphorus-containing anhydrides; GO:0016887 ATPase activity; GO:0017110 nucleoside-diphosphatase activity; GO:0017111 nucleoside-tri…			F	KOG1386	Nucleoside phosphatase
P53680	45	K	0.197	0.0123488	Down	AP-2 complex subunit sigma OS=Homo sapiens OX=9606 GN=AP2S1 PE=1 SV=2	AP2S1	1	5.19382e-15	162.21	2	DAK(1)HTNFVEFR	1.9401		2.94			1.385	0.385			0.453	0.439	mitochondria	K11827	AP2S1; AP-2 complex subunit sigma-1	hsa04961 Endocrine and other factor-regulated calcium reabsorption; hsa04721 Synaptic vesicle cycle; hsa05016 Huntington disease; hsa04144 Endocytosis	GO:0002376 immune system process; GO:0002478 antigen processing and presentation of exogenous peptide antigen; GO:0002495 antigen processing and presentation of peptide antigen via MHC class II; GO:0002504 antigen processing and presentation of peptide or polysaccharide antigen via MHC class II; GO:0006807 nitrogen compound metabolic process; GO:0006810 transport; GO:0006897 endocytosis; GO:00068…	GO:0000323 lytic vacuole; GO:0005622 intracellular; GO:0005623 cell; GO:0005737 cytoplasm; GO:0005764 lysosome; GO:0005765 lysosomal membrane; GO:0005768 endosome; GO:0005773 vacuole; GO:0005774 vacuolar membrane; GO:0005829 cytosol; GO:0005886 plasma membrane; GO:0005905 clathrin-coated pit; GO:0010008 endosome membrane; GO:0012505 endomembrane system; GO:0012506 vesicle membrane; GO:0016020 mem…	GO:0005215 transporter activity;	PF01217	Clathrin adaptor complex small chain	U	KOG0935	Clathrin adaptor complex, small subunit
P54725	69	K	0.531	0.0480222	Down	UV excision repair protein RAD23 homolog A OS=Homo sapiens OX=9606 GN=RAD23A PE=1 SV=1	RAD23A	1	1.26043e-30	165.72	2	IDEK(1)NFVVVMVTK	-3.1659	1.611	0.794	2.378	0.766	1.22	0.824	0.627	0.878	0.484	0.78	mitochondria	K10839	RAD23; UV excision repair protein RAD23	hsa03420 Nucleotide excision repair; hsa04141 Protein processing in endoplasmic reticulum	GO:0006139 nucleobase-containing compound metabolic process; GO:0006259 DNA metabolic process; GO:0006281 DNA repair; GO:0006289 nucleotide-excision repair; GO:0006464 cellular protein modification process; GO:0006508 proteolysis; GO:0006725 cellular aromatic compound metabolic process; GO:0006807 nitrogen compound metabolic process; GO:0006950 response to stress; GO:0006974 cellular response to …	GO:0005622 intracellular; GO:0005623 cell; GO:0005634 nucleus; GO:0005654 nucleoplasm; GO:0005737 cytoplasm; GO:0005815 microtubule organizing center; GO:0005829 cytosol; GO:0005856 cytoskeleton; GO:0015630 microtubule cytoskeleton; GO:0031974 membrane-enclosed lumen; GO:0031981 nuclear lumen; GO:0032991 protein-containing complex; GO:0043226 organelle; GO:0043227 membrane-bounded organelle; GO:0…	GO:0002020 protease binding; GO:0003676 nucleic acid binding; GO:0003677 DNA binding; GO:0003697 single-stranded DNA binding; GO:0005488 binding; GO:0005515 protein binding; GO:0019899 enzyme binding; GO:0019900 kinase binding; GO:0031593 polyubiquitin modification-dependent protein binding; GO:0097159 organic cyclic compound binding; GO:0140030 modification-dependent protein binding; GO:1901363 …	PF00240; PF00627; PF09280	Ubiquitin family; UBA/TS-N domain; XPC-binding domain	L	KOG0011	Nucleotide excision repair factor NEF2, RAD23 component
P54727	24	K	0.542	0.0203414	Down	UV excision repair protein RAD23 homolog B OS=Homo sapiens OX=9606 GN=RAD23B PE=1 SV=1	RAD23B	0.998364	5.70008e-06	127.03	2	IDIDPEETVK(0.998)ALK(0.002)	3.7541	1.081	0.954	1.736	1.653	0.876	0.601	0.83	1.05	0.42	0.514	cytoplasm	K10839	RAD23; UV excision repair protein RAD23	hsa03420 Nucleotide excision repair; hsa04141 Protein processing in endoplasmic reticulum	GO:0000003 reproduction; GO:0000715 nucleotide-excision repair, DNA damage recognition; GO:0006139 nucleobase-containing compound metabolic process; GO:0006259 DNA metabolic process; GO:0006281 DNA repair; GO:0006289 nucleotide-excision repair; GO:0006294 nucleotide-excision repair, preincision complex assembly; GO:0006457 protein folding; GO:0006464 cellular protein modification process; GO:0006…	GO:0000109 nucleotide-excision repair complex; GO:0005622 intracellular; GO:0005623 cell; GO:0005634 nucleus; GO:0005654 nucleoplasm; GO:0005737 cytoplasm; GO:0005829 cytosol; GO:0031974 membrane-enclosed lumen; GO:0031981 nuclear lumen; GO:0032991 protein-containing complex; GO:0043226 organelle; GO:0043227 membrane-bounded organelle; GO:0043229 intracellular organelle; GO:0043231 intracellular …	GO:0003676 nucleic acid binding; GO:0003677 DNA binding; GO:0003697 single-stranded DNA binding; GO:0005488 binding; GO:0005515 protein binding; GO:0031593 polyubiquitin modification-dependent protein binding; GO:0097159 organic cyclic compound binding; GO:0140030 modification-dependent protein binding; GO:1901363 heterocyclic compound binding;	PF00240; PF00627; PF09280	Ubiquitin family; UBA/TS-N domain; XPC-binding domain	L	KOG0011	Nucleotide excision repair factor NEF2, RAD23 component
P56937	315	K	0.482	0.0262051	Down	3-keto-steroid reductase/17-beta-hydroxysteroid dehydrogenase 7 OS=Homo sapiens OX=9606 GN=HSD17B7 PE=1 SV=1	HSD17B7	1	7.63786e-08	183	2	FYQK(1)LLELEK	-0.097074	1.521	1.038	1.382	1.444	0.872		1.25	0.541	0.334	0.286	mitochondria	K13373	HSD17B7; 17beta-estradiol 17-dehydrogenase / 3beta-hydroxysteroid 3-dehydrogenase [EC:1.1.1.62 1.1.1.270]	hsa00140 Steroid hormone biosynthesis; hsa04913 Ovarian steroidogenesis; hsa00100 Steroid biosynthesis; hsa01100 Metabolic pathways	GO:0000003 reproduction; GO:0006066 alcohol metabolic process; GO:0006629 lipid metabolic process; GO:0006694 steroid biosynthetic process; GO:0006695 cholesterol biosynthetic process; GO:0007275 multicellular organism development; GO:0007399 nervous system development; GO:0007417 central nervous system development; GO:0007420 brain development; GO:0007565 female pregnancy; GO:0008152 metabolic p…	GO:0005622 intracellular; GO:0005623 cell; GO:0005737 cytoplasm; GO:0005783 endoplasmic reticulum; GO:0005789 endoplasmic reticulum membrane; GO:0005886 plasma membrane; GO:0012505 endomembrane system; GO:0016020 membrane; GO:0031984 organelle subcompartment; GO:0042175 nuclear outer membrane-endoplasmic reticulum membrane network; GO:0043226 organelle; GO:0043227 membrane-bounded organelle; GO:0…	GO:0000253 3-keto sterol reductase activity; GO:0003824 catalytic activity; GO:0004303 estradiol 17-beta-dehydrogenase activity; GO:0005102 signaling receptor binding; GO:0005126 cytokine receptor binding; GO:0005148 prolactin receptor binding; GO:0005488 binding; GO:0005515 protein binding; GO:0016229 steroid dehydrogenase activity; GO:0016491 oxidoreductase activity; GO:0016614 oxidoreductase a…	PF00106	short chain dehydrogenase	Q	KOG1478	3-keto sterol reductase
P60880	103	K	3.236	0.00922569	Up	Synaptosomal-associated protein 25 OS=Homo sapiens OX=9606 GN=SNAP25 PE=1 SV=1	SNAP25	1	5.70093e-32	194.83	2	K(1)AWGNNQDGVVASQPAR	-0.75915	0.378		0.204	0.676	0.38		1.208	1.627	1.141		cytoplasm	K18211	SNAP25; synaptosomal-associated protein 25	hsa04721 Synaptic vesicle cycle; hsa04911 Insulin secretion	GO:0000902 cell morphogenesis; GO:0000904 cell morphogenesis involved in differentiation; GO:0001504 neurotransmitter uptake; GO:0001505 regulation of neurotransmitter levels; GO:0001775 cell activation; GO:0002252 immune effector process; GO:0002263 cell activation involved in immune response; GO:0002274 myeloid leukocyte activation; GO:0002275 myeloid cell activation involved in immune response…	GO:0005622 intracellular; GO:0005623 cell; GO:0005737 cytoplasm; GO:0005768 endosome; GO:0005794 Golgi apparatus; GO:0005802 trans-Golgi network; GO:0005829 cytosol; GO:0005856 cytoskeleton; GO:0005886 plasma membrane; GO:0005887 integral component of plasma membrane; GO:0008021 synaptic vesicle; GO:0008076 voltage-gated potassium channel complex; GO:0009898 cytoplasmic side of plasma membrane; G…	GO:0000149 SNARE binding; GO:0005215 transporter activity; GO:0005216 ion channel activity; GO:0005244 voltage-gated ion channel activity; GO:0005249 voltage-gated potassium channel activity; GO:0005261 cation channel activity; GO:0005267 potassium channel activity; GO:0005484 SNAP receptor activity; GO:0005488 binding; GO:0005515 protein binding; GO:0008092 cytoskeletal protein binding; GO:00083…			U	KOG3065	SNAP-25 (synaptosome-associated protein) component of SNARE complex
P61619	107	K	0.352	0.0493369	Down	Protein transport protein Sec61 subunit alpha isoform 1 OS=Homo sapiens OX=9606 GN=SEC61A1 PE=1 SV=2	SEC61A1	1	2.41507e-15	174.8	2	IIEVGDTPK(1)DR	-0.76298	4.178	1.192	0.639	0.692	1.224	0.55	0.52	0.584	0.484	0.654	plasma membrane	K10956	SEC61A; protein transport protein SEC61 subunit alpha	hsa04145 Phagosome; hsa03060 Protein export; hsa05110 Vibrio cholerae infection; hsa04141 Protein processing in endoplasmic reticulum	GO:0001655 urogenital system development; GO:0001822 kidney development; GO:0002376 immune system process; GO:0006605 protein targeting; GO:0006612 protein targeting to membrane; GO:0006613 cotranslational protein targeting to membrane; GO:0006614 SRP-dependent cotranslational protein targeting to membrane; GO:0006620 posttranslational protein targeting to endoplasmic reticulum membrane; GO:00068…	GO:0005622 intracellular; GO:0005623 cell; GO:0005737 cytoplasm; GO:0005783 endoplasmic reticulum; GO:0005789 endoplasmic reticulum membrane; GO:0005791 rough endoplasmic reticulum; GO:0005829 cytosol; GO:0012505 endomembrane system; GO:0012506 vesicle membrane; GO:0016020 membrane; GO:0016021 integral component of membrane; GO:0030139 endocytic vesicle; GO:0030176 integral component of endoplasm…	GO:0005215 transporter activity; GO:0005488 binding; GO:0022857 transmembrane transporter activity; GO:0043021 ribonucleoprotein complex binding; GO:0043022 ribosome binding; GO:0044877 protein-containing complex binding;	PF10559	Plug domain of Sec61p	U	KOG1373	Transport protein Sec61, alpha subunit
P62258	29	K	0.593	0.0422218	Down	14-3-3 protein epsilon OS=Homo sapiens OX=9606 GN=YWHAE PE=1 SV=1	YWHAE	1	2.18774e-09	166.66	2	K(1)VAGMDVELTVEER	0.76671	1.728	1.024	1.034	1.03	0.888		0.771		0.807	0.453	cytoplasm	K06630	YWHAE; 14-3-3 protein epsilon	hsa05160 Hepatitis C; hsa05203 Viral carcinogenesis; hsa04621 NOD-like receptor signaling pathway; hsa04722 Neurotrophin signaling pathway; hsa04110 Cell cycle; hsa04390 Hippo signaling pathway; hsa04151 PI3K-Akt signaling pathway; hsa04114 Oocyte meiosis	GO:0000086 G2/M transition of mitotic cell cycle; GO:0000165 MAPK cascade; GO:0000278 mitotic cell cycle; GO:0001508 action potential; GO:0001764 neuron migration; GO:0001932 regulation of protein phosphorylation; GO:0001933 negative regulation of protein phosphorylation; GO:0002027 regulation of heart rate; GO:0003062 regulation of heart rate by chemical signal; GO:0003064 regulation of heart ra…	GO:0005622 intracellular; GO:0005623 cell; GO:0005634 nucleus; GO:0005737 cytoplasm; GO:0005829 cytosol; GO:0005856 cytoskeleton; GO:0005871 kinesin complex; GO:0005875 microtubule associated complex; GO:0015630 microtubule cytoskeleton; GO:0030424 axon; GO:0030426 growth cone; GO:0030427 site of polarized growth; GO:0032991 protein-containing complex; GO:0042995 cell projection; GO:0043005 neuro…	GO:0004857 enzyme inhibitor activity; GO:0004860 protein kinase inhibitor activity; GO:0005085 guanyl-nucleotide exchange factor activity; GO:0005088 Ras guanyl-nucleotide exchange factor activity; GO:0005246 calcium channel regulator activity; GO:0005488 binding; GO:0005515 protein binding; GO:0008426 protein kinase C inhibitor activity; GO:0015459 potassium channel regulator activity; GO:001624…	PF00244	14-3-3 protein	O	KOG0841	Multifunctional chaperone (14-3-3 family)
P62333	7	K	0.249	0.0393556	Down	26S proteasome regulatory subunit 10B OS=Homo sapiens OX=9606 GN=PSMC6 PE=1 SV=1	PSMC6	1	0.00324909	126.82	2	DK(1)ALQDYR	-2.3856	1.433	0.861	0.586		2.106		0.296		0.326		cytoplasm	K03064	PSMC6; 26S proteasome regulatory subunit T4	hsa05017 Spinocerebellar ataxia; hsa05016 Huntington disease; hsa03050 Proteasome; hsa05169 Epstein-Barr virus infection; hsa05012 Parkinson disease; hsa05010 Alzheimer disease; hsa05022 Pathways of neurodegeneration - multiple diseases; hsa05014 Amyotrophic lateral sclerosis; hsa05020 Prion disease	GO:0006355 regulation of transcription, DNA-templated; GO:0006357 regulation of transcription by RNA polymerase II; GO:0006464 cellular protein modification process; GO:0006508 proteolysis; GO:0006511 ubiquitin-dependent protein catabolic process; GO:0006807 nitrogen compound metabolic process; GO:0006950 response to stress; GO:0008152 metabolic process; GO:0009056 catabolic process; GO:0009057 m…	GO:0000502 proteasome complex; GO:0005622 intracellular; GO:0005623 cell; GO:0005634 nucleus; GO:0005654 nucleoplasm; GO:0005737 cytoplasm; GO:0005829 cytosol; GO:0005838 proteasome regulatory particle; GO:0008540 proteasome regulatory particle, base subcomplex; GO:0016234 inclusion body; GO:0022624 proteasome accessory complex; GO:0031595 nuclear proteasome complex; GO:0031597 cytosolic proteaso…	GO:0003824 catalytic activity; GO:0005488 binding; GO:0005515 protein binding; GO:0008134 transcription factor binding; GO:0016462 pyrophosphatase activity; GO:0016787 hydrolase activity; GO:0016817 hydrolase activity, acting on acid anhydrides; GO:0016818 hydrolase activity, acting on acid anhydrides, in phosphorus-containing anhydrides; GO:0016887 ATPase activity; GO:0017025 TBP-class protein b…	PF00004	ATPase family associated with various cellular activities (AAA)	O	KOG0651	26S proteasome regulatory complex, ATPase RPT4
P62333	20	K	0.421	0.0446093	Down	26S proteasome regulatory subunit 10B OS=Homo sapiens OX=9606 GN=PSMC6 PE=1 SV=1	PSMC6	1	0.000597475	74.849	2	LLEHK(1)EIDGR	0.86732	2.322		0.833	0.822	1.447	0.845		0.461	0.311	0.664	cytoplasm	K03064	PSMC6; 26S proteasome regulatory subunit T4	hsa05017 Spinocerebellar ataxia; hsa05016 Huntington disease; hsa03050 Proteasome; hsa05169 Epstein-Barr virus infection; hsa05012 Parkinson disease; hsa05010 Alzheimer disease; hsa05022 Pathways of neurodegeneration - multiple diseases; hsa05014 Amyotrophic lateral sclerosis; hsa05020 Prion disease	GO:0006355 regulation of transcription, DNA-templated; GO:0006357 regulation of transcription by RNA polymerase II; GO:0006464 cellular protein modification process; GO:0006508 proteolysis; GO:0006511 ubiquitin-dependent protein catabolic process; GO:0006807 nitrogen compound metabolic process; GO:0006950 response to stress; GO:0008152 metabolic process; GO:0009056 catabolic process; GO:0009057 m…	GO:0000502 proteasome complex; GO:0005622 intracellular; GO:0005623 cell; GO:0005634 nucleus; GO:0005654 nucleoplasm; GO:0005737 cytoplasm; GO:0005829 cytosol; GO:0005838 proteasome regulatory particle; GO:0008540 proteasome regulatory particle, base subcomplex; GO:0016234 inclusion body; GO:0022624 proteasome accessory complex; GO:0031595 nuclear proteasome complex; GO:0031597 cytosolic proteaso…	GO:0003824 catalytic activity; GO:0005488 binding; GO:0005515 protein binding; GO:0008134 transcription factor binding; GO:0016462 pyrophosphatase activity; GO:0016787 hydrolase activity; GO:0016817 hydrolase activity, acting on acid anhydrides; GO:0016818 hydrolase activity, acting on acid anhydrides, in phosphorus-containing anhydrides; GO:0016887 ATPase activity; GO:0017025 TBP-class protein b…	PF00004	ATPase family associated with various cellular activities (AAA)	O	KOG0651	26S proteasome regulatory complex, ATPase RPT4
Q00610	619	K	0.393	0.0163284	Down	Clathrin heavy chain 1 OS=Homo sapiens OX=9606 GN=CLTC PE=1 SV=5	CLTC	1	4.10851e-20	175.54	3	AHIAQLCEK(1)AGLLQR	-0.074306	3.134	1.007	0.959	0.959	1.131	0.854	0.566	0.462	0.307	0.639	cytoplasm	K04646	CLTC; clathrin heavy chain	hsa04961 Endocrine and other factor-regulated calcium reabsorption; hsa05100 Bacterial invasion of epithelial cells; hsa04721 Synaptic vesicle cycle; hsa04142 Lysosome; hsa05016 Huntington disease; hsa04144 Endocytosis				PF13838	Clathrin-H-link	U	KOG0985	Vesicle coat protein clathrin, heavy chain
Q04656	333	K	0.171	0.0491963	Down	Copper-transporting ATPase 1 OS=Homo sapiens OX=9606 GN=ATP7A PE=1 SV=4	ATP7A	1	2.53731e-05	103.69	2	K(1)AIEAVSPGLYR	-6.8633	5.743				1.07	0.573	0.322	0.275	0.637	1.098	plasma membrane	K17686	copA; P-type Cu+ transporter [EC:7.2.2.8]	hsa04978 Mineral absorption; hsa01524 Platinum drug resistance	GO:0000041 transition metal ion transport; GO:0000302 response to reactive oxygen species; GO:0000303 response to superoxide; GO:0000305 response to oxygen radical; GO:0000902 cell morphogenesis; GO:0000904 cell morphogenesis involved in differentiation; GO:0001101 response to acid chemical; GO:0001501 skeletal system development; GO:0001505 regulation of neurotransmitter levels; GO:0001568 blood…	GO:0005622 intracellular; GO:0005623 cell; GO:0005634 nucleus; GO:0005737 cytoplasm; GO:0005768 endosome; GO:0005770 late endosome; GO:0005783 endoplasmic reticulum; GO:0005794 Golgi apparatus; GO:0005798 Golgi-associated vesicle; GO:0005802 trans-Golgi network; GO:0005829 cytosol; GO:0005886 plasma membrane; GO:0005902 microvillus; GO:0005903 brush border; GO:0012505 endomembrane system; GO:0012…	GO:0000166 nucleotide binding; GO:0003824 catalytic activity; GO:0005215 transporter activity; GO:0005375 copper ion transmembrane transporter activity; GO:0005488 binding; GO:0005507 copper ion binding; GO:0005515 protein binding; GO:0005524 ATP binding; GO:0008047 enzyme activator activity; GO:0008144 drug binding; GO:0008324 cation transmembrane transporter activity; GO:0015075 ion transmembra…	PF00403; PF00702	Heavy-metal-associated domain; haloacid dehalogenase-like hydrolase	P	KOG0207	Cation transport ATPase
Q12791	583	K	0.204	0.0236778	Down	Calcium-activated potassium channel subunit alpha-1 OS=Homo sapiens OX=9606 GN=KCNMA1 PE=1 SV=2	KCNMA1	1	3.90214e-15	160.62	2	SFIK(1)IEEDTWQK	-2.4474	0.957		1.552	1.434	1.785	0.101	0.482				plasma membrane	K04936	KCNMA1; potassium large conductance calcium-activated channel subfamily M alpha member 1	hsa04972 Pancreatic secretion; hsa04270 Vascular smooth muscle contraction; hsa04924 Renin secretion; hsa04911 Insulin secretion; hsa04970 Salivary secretion; hsa04022 cGMP-PKG signaling pathway	GO:0001508 action potential; GO:0001666 response to hypoxia; GO:0002065 columnar/cuboidal epithelial cell differentiation; GO:0003008 system process; GO:0003012 muscle system process; GO:0003013 circulatory system process; GO:0003014 renal system process; GO:0003018 vascular process in circulatory system; GO:0006810 transport; GO:0006811 ion transport; GO:0006812 cation transport; GO:0006813 pota…	GO:0005576 extracellular region; GO:0005615 extracellular space; GO:0005622 intracellular; GO:0005623 cell; GO:0005737 cytoplasm; GO:0005783 endoplasmic reticulum; GO:0005886 plasma membrane; GO:0005887 integral component of plasma membrane; GO:0005901 caveola; GO:0008076 voltage-gated potassium channel complex; GO:0009897 external side of plasma membrane; GO:0009986 cell surface; GO:0012505 endo…	GO:0003779 actin binding; GO:0005215 transporter activity; GO:0005216 ion channel activity; GO:0005227 calcium activated cation channel activity; GO:0005244 voltage-gated ion channel activity; GO:0005249 voltage-gated potassium channel activity; GO:0005261 cation channel activity; GO:0005267 potassium channel activity; GO:0005488 binding; GO:0005515 protein binding; GO:0008092 cytoskeletal protei…			P	KOG1420	Ca2+-activated K+ channel Slowpoke, alpha subunit
Q13505	227	K	0.103	0.0283563	Down	Metaxin-1 OS=Homo sapiens OX=9606 GN=MTX1 PE=1 SV=3	MTX1	1	0.000103679	108.2	2	EK(1)YNADYDLSAR	-3.371	4.823				1.3		0.241	0.404	0.304		nucleus	K17776				GO:0016020 membrane; GO:0016021 integral component of membrane; GO:0031224 intrinsic component of membrane;				U	KOG3028	Translocase of outer mitochondrial membrane complex, subunit TOM37/Metaxin 1
Q13555	268	K	0.046	0.0173978	Down	Calcium/calmodulin-dependent protein kinase type II subunit gamma OS=Homo sapiens OX=9606 GN=CAMK2G PE=1 SV=4	CAMK2G	1	1.15896e-05	93.162	3	ITADQALK(1)HPWVCQR	0.8595	8.149	2.316				0.338	0.261	0.116			cytoplasm	K04515	CAMK2; calcium/calmodulin-dependent protein kinase (CaM kinase) II [EC:2.7.11.17]	hsa04360 Axon guidance; hsa05200 Pathways in cancer; hsa05415 Diabetic cardiomyopathy; hsa04261 Adrenergic signaling in cardiomyocytes; hsa05012 Parkinson disease; hsa04310 Wnt signaling pathway; hsa05205 Proteoglycans in cancer; hsa05022 Pathways of neurodegeneration - multiple diseases; hsa04012 ErbB signaling pathway; hsa04934 Cushing syndrome; hsa04971 Gastric acid secretion; hsa05214 Glioma;…	GO:0000082 G1/S transition of mitotic cell cycle; GO:0000165 MAPK cascade; GO:0000278 mitotic cell cycle; GO:0001666 response to hypoxia; GO:0002376 immune system process; GO:0002790 peptide secretion; GO:0006464 cellular protein modification process; GO:0006468 protein phosphorylation; GO:0006470 protein dephosphorylation; GO:0006793 phosphorus metabolic process; GO:0006796 phosphate-containing …	GO:0005622 intracellular; GO:0005623 cell; GO:0005634 nucleus; GO:0005654 nucleoplasm; GO:0005737 cytoplasm; GO:0005829 cytosol; GO:0005886 plasma membrane; GO:0012506 vesicle membrane; GO:0014069 postsynaptic density; GO:0016020 membrane; GO:0030139 endocytic vesicle; GO:0030659 cytoplasmic vesicle membrane; GO:0030666 endocytic vesicle membrane; GO:0031090 organelle membrane; GO:0031410 cytopla…	GO:0003824 catalytic activity; GO:0004672 protein kinase activity; GO:0004674 protein serine/threonine kinase activity; GO:0004683 calmodulin-dependent protein kinase activity; GO:0004721 phosphoprotein phosphatase activity; GO:0004722 protein serine/threonine phosphatase activity; GO:0004723 calcium-dependent protein serine/threonine phosphatase activity; GO:0005085 guanyl-nucleotide exchange fa…	PF00069; PF08332	Protein kinase domain; Calcium/calmodulin dependent protein kinase II Association	T	KOG0033	Ca2+/calmodulin-dependent protein kinase, EF-Hand protein superfamily
Q14204	3757	K	0.284	0.0410725	Down	Cytoplasmic dynein 1 heavy chain 1 OS=Homo sapiens OX=9606 GN=DYNC1H1 PE=1 SV=5	DYNC1H1	1	6.73861e-06	153.33	2	SLLQALNEVK(1)GR	-5.8473	2.366				1.273		0.502	0.949	0.329	0.285	cytoplasm	K10413	DYNC1H; dynein heavy chain 1, cytosolic	hsa05132 Salmonella infection; hsa04145 Phagosome; hsa04962 Vasopressin-regulated water reabsorption	GO:0000086 G2/M transition of mitotic cell cycle; GO:0000226 microtubule cytoskeleton organization; GO:0000278 mitotic cell cycle; GO:0001775 cell activation; GO:0002252 immune effector process; GO:0002263 cell activation involved in immune response; GO:0002274 myeloid leukocyte activation; GO:0002275 myeloid cell activation involved in immune response; GO:0002283 neutrophil activation involved i…	GO:0000323 lytic vacuole; GO:0005576 extracellular region; GO:0005622 intracellular; GO:0005623 cell; GO:0005737 cytoplasm; GO:0005764 lysosome; GO:0005766 primary lysosome; GO:0005773 vacuole; GO:0005775 vacuolar lumen; GO:0005813 centrosome; GO:0005815 microtubule organizing center; GO:0005829 cytosol; GO:0005856 cytoskeleton; GO:0005868 cytoplasmic dynein complex; GO:0005874 microtubule; GO:00…	GO:0005488 binding; GO:0005515 protein binding; GO:0045503 dynein light chain binding; GO:0045505 dynein intermediate chain binding; GO:0051959 dynein light intermediate chain binding;	PF12774; PF12775; PF12780; PF12777; PF12781; PF03028	Hydrolytic ATP binding site of dynein motor region D1; P-loop containing dynein motor region D3; P-loop containing dynein motor region D4; Microtubule-binding stalk of dynein motor; ATP-binding dynein motor region D5; Dynein heavy chain and region D6 of dynein motor	Z	KOG3595	Dyneins, heavy chain
Q14966	943	K	0.476	0.00360388	Down	Zinc finger protein 638 OS=Homo sapiens OX=9606 GN=ZNF638 PE=1 SV=2	ZNF638	1	0.00276261	106.93	2	K(1)AYIEINR	-1.4678		1.942	1.131		1.583	0.85	0.793	0.581	0.851	0.621	nucleus	K24692			GO:0006139 nucleobase-containing compound metabolic process; GO:0006396 RNA processing; GO:0006725 cellular aromatic compound metabolic process; GO:0006807 nitrogen compound metabolic process; GO:0008152 metabolic process; GO:0008380 RNA splicing; GO:0009987 cellular process; GO:0010467 gene expression; GO:0016070 RNA metabolic process; GO:0034641 cellular nitrogen compound metabolic process; GO:…	GO:0005622 intracellular; GO:0005623 cell; GO:0005634 nucleus; GO:0005654 nucleoplasm; GO:0005737 cytoplasm; GO:0031974 membrane-enclosed lumen; GO:0031981 nuclear lumen; GO:0043226 organelle; GO:0043227 membrane-bounded organelle; GO:0043229 intracellular organelle; GO:0043231 intracellular membrane-bounded organelle; GO:0043233 organelle lumen; GO:0070013 intracellular organelle lumen;	GO:0003676 nucleic acid binding; GO:0003677 DNA binding; GO:0003690 double-stranded DNA binding; GO:0005488 binding; GO:0097159 organic cyclic compound binding; GO:1901363 heterocyclic compound binding;	PF00076	RNA recognition motif. (a.k.a. RRM, RBD, or RNP domain)
Q15904	460	K	0.232	0.047386	Down	V-type proton ATPase subunit S1 OS=Homo sapiens OX=9606 GN=ATP6AP1 PE=1 SV=2	ATP6AP1	1	2.76647e-20	147.02	3	TMDRFDDHK(1)GPTISLTQIV	0.0078753	3.251	0.508	2.062	0.477	0.377	0.11	0.417	0.432	0.285	0.303	plasma membrane	K03662	ATPeVS1; V-type H+-transporting ATPase S1 subunit	hsa05120 Epithelial cell signaling in Helicobacter pylori infection; hsa04142 Lysosome; hsa05152 Tuberculosis; hsa05161 Hepatitis B; hsa00190 Oxidative phosphorylation; hsa05110 Vibrio cholerae infection; hsa05165 Human papillomavirus infection; hsa04145 Phagosome; hsa05323 Rheumatoid arthritis; hsa01100 Metabolic pathways	GO:0000041 transition metal ion transport; GO:0001932 regulation of protein phosphorylation; GO:0001934 positive regulation of protein phosphorylation; GO:0002682 regulation of immune system process; GO:0002684 positive regulation of immune system process; GO:0002761 regulation of myeloid leukocyte differentiation; GO:0002763 positive regulation of myeloid leukocyte differentiation; GO:0006810 tr…	GO:0005622 intracellular; GO:0005623 cell; GO:0005737 cytoplasm; GO:0005768 endosome; GO:0010008 endosome membrane; GO:0012505 endomembrane system; GO:0016020 membrane; GO:0016469 proton-transporting two-sector ATPase complex; GO:0031090 organelle membrane; GO:0031410 cytoplasmic vesicle; GO:0031982 vesicle; GO:0032991 protein-containing complex; GO:0043226 organelle; GO:0043227 membrane-bounded …	GO:0005215 transporter activity; GO:0005488 binding; GO:0005515 protein binding; GO:0017016 Ras GTPase binding; GO:0017137 Rab GTPase binding; GO:0019899 enzyme binding; GO:0031267 small GTPase binding; GO:0051020 GTPase binding;			P	KOG3868	Vacuolar H+-ATPase V0 sector, accessory subunit S1 (Ac45)
Q16181	213	K	0.524	0.0376149	Down	Septin-7 OS=Homo sapiens OX=9606 GN=SEPTIN7 PE=1 SV=2	SEPTIN7	1	0.000420078	115.86	2	QIMK(1)EIQEHK	0.15069	1.21				1.193	0.574	0.814			0.5	cytoplasm	K16944	SEPT7; septin 7	hsa05131 Shigellosis	GO:0000278 mitotic cell cycle; GO:0000281 mitotic cytokinesis; GO:0000902 cell morphogenesis; GO:0000904 cell morphogenesis involved in differentiation; GO:0000910 cytokinesis; GO:0006996 organelle organization; GO:0007010 cytoskeleton organization; GO:0007049 cell cycle; GO:0007275 multicellular organism development; GO:0007399 nervous system development; GO:0007409 axonogenesis; GO:0008360 regu…	GO:0001725 stress fiber; GO:0005622 intracellular; GO:0005623 cell; GO:0005634 nucleus; GO:0005737 cytoplasm; GO:0005856 cytoskeleton; GO:0005929 cilium; GO:0005930 axoneme; GO:0005938 cell cortex; GO:0005940 septin ring; GO:0015629 actin cytoskeleton; GO:0016020 membrane; GO:0030424 axon; GO:0031105 septin complex; GO:0031514 motile cilium; GO:0032156 septin cytoskeleton; GO:0032160 septin filam…	GO:0005488 binding; GO:0005515 protein binding; GO:0042802 identical protein binding; GO:0046982 protein heterodimerization activity; GO:0046983 protein dimerization activity;	PF00735	Septin	DUZ	KOG2655	Septin family protein (P-loop GTPase)
Q5SRE5	876	K	0.613	0.031714	Down	Nucleoporin NUP188 OS=Homo sapiens OX=9606 GN=NUP188 PE=1 SV=1	NUP188	1	1.01629e-07	122.54	2	LAIQLLK(1)R	-1.724	2.023	1.327	1.109	0.962	1.209	0.776	0.712	1.007	1.084	0.485	cytoplasm	K14311	NUP188; nuclear pore complex protein Nup188	hsa05014 Amyotrophic lateral sclerosis; hsa03013 RNA transport	GO:0001667 ameboidal-type cell migration; GO:0006403 RNA localization; GO:0006405 RNA export from nucleus; GO:0006406 mRNA export from nucleus; GO:0006606 protein import into nucleus; GO:0006611 protein export from nucleus; GO:0006810 transport; GO:0006886 intracellular protein transport; GO:0006913 nucleocytoplasmic transport; GO:0006928 movement of cell or subcellular component; GO:0008104 prot…	GO:0005622 intracellular; GO:0005623 cell; GO:0005634 nucleus; GO:0005635 nuclear envelope; GO:0005643 nuclear pore; GO:0012505 endomembrane system; GO:0031967 organelle envelope; GO:0031975 envelope; GO:0032991 protein-containing complex; GO:0043226 organelle; GO:0043227 membrane-bounded organelle; GO:0043229 intracellular organelle; GO:0043231 intracellular membrane-bounded organelle; GO:004461…	GO:0005198 structural molecule activity; GO:0017056 structural constituent of nuclear pore;			S	KOG4833	Uncharacterized conserved protein
Q6P2Q9	609	K	0.42	0.0376458	Down	Pre-mRNA-processing-splicing factor 8 OS=Homo sapiens OX=9606 GN=PRPF8 PE=1 SV=2	PRPF8	1	8.80953e-05	96.311	2	DLK(1)HLIYYR	-2.4832	1.289	0.653	1.347	1.737	1.758	0.415	0.996		0.3		cytoplasm	K12856	PRPF8; pre-mRNA-processing factor 8	hsa03040 Spliceosome	GO:0000244 spliceosomal tri-snRNP complex assembly; GO:0000375 RNA splicing, via transesterification reactions; GO:0000377 RNA splicing, via transesterification reactions with bulged adenosine as nucleophile; GO:0000387 spliceosomal snRNP assembly; GO:0000398 mRNA splicing, via spliceosome; GO:0002237 response to molecule of bacterial origin; GO:0006139 nucleobase-containing compound metabolic pr…	GO:0005622 intracellular; GO:0005623 cell; GO:0005634 nucleus; GO:0005654 nucleoplasm; GO:0005681 spliceosomal complex; GO:0005682 U5 snRNP; GO:0005684 U2-type spliceosomal complex; GO:0030532 small nuclear ribonucleoprotein complex; GO:0031974 membrane-enclosed lumen; GO:0031981 nuclear lumen; GO:0032991 protein-containing complex; GO:0043226 organelle; GO:0043227 membrane-bounded organelle; GO:…	GO:0000386 second spliceosomal transesterification activity; GO:0003676 nucleic acid binding; GO:0003723 RNA binding; GO:0003824 catalytic activity; GO:0005488 binding; GO:0005515 protein binding; GO:0017069 snRNA binding; GO:0017070 U6 snRNA binding; GO:0030619 U1 snRNA binding; GO:0030620 U2 snRNA binding; GO:0030623 U5 snRNA binding; GO:0031593 polyubiquitin modification-dependent protein bind…	PF08082; PF08083; PF10598; PF10597; PF10596; PF12134; PF08084	PRO8NT (NUC069), PrP8 N-terminal domain; PROCN (NUC071) domain; RNA recognition motif of the spliceosomal PrP8; U5-snRNA binding site 2 of PrP8; U6-snRNA interacting domain of PrP8; PRP8 domain IV core; PROCT (NUC072) domain	A	KOG1795	U5 snRNP spliceosome subunit
Q6UXG2	943	K	0.426	0.0333667	Down	Endosome/lysosome-associated apoptosis and autophagy regulator 1 OS=Homo sapiens OX=9606 GN=ELAPOR1 PE=1 SV=2	ELAPOR1	1	9.23986e-11	160.98	2	YSK(1)LVMNATLK	-1.8966	2.49	1.132	1.979	0.935	0.726	0.255	1.178	0.536	0.65	0.472	nucleus				GO:0000045 autophagosome assembly; GO:0006914 autophagy; GO:0006950 response to stress; GO:0006996 organelle organization; GO:0007033 vacuole organization; GO:0007154 cell communication; GO:0008152 metabolic process; GO:0009056 catabolic process; GO:0009267 cellular response to starvation; GO:0009605 response to external stimulus; GO:0009893 positive regulation of metabolic process; GO:0009894 re…	GO:0005623 cell; GO:0005886 plasma membrane; GO:0005887 integral component of plasma membrane; GO:0016020 membrane; GO:0016021 integral component of membrane; GO:0031224 intrinsic component of membrane; GO:0031226 intrinsic component of plasma membrane; GO:0071944 cell periphery;				T	KOG1217	Fibrillins and related proteins containing Ca2+-binding EGF-like domains
Q6ZVM7	447	K	0.162	0.0178877	Down	TOM1-like protein 2 OS=Homo sapiens OX=9606 GN=TOM1L2 PE=1 SV=1	TOM1L2	1	0.000194305	81.373	2	TDLK(1)GDDLEEGVTSEEFDK	1.1476	1.878	2.12					0.211	0.544	0.214		nucleus				GO:0007088 regulation of mitotic nuclear division; GO:0007154 cell communication; GO:0007165 signal transduction; GO:0007346 regulation of mitotic cell cycle; GO:0009987 cellular process; GO:0010564 regulation of cell cycle process; GO:0010639 negative regulation of organelle organization; GO:0010948 negative regulation of cell cycle process; GO:0023052 signaling; GO:0033043 regulation of organel…		GO:0005488 binding; GO:0005515 protein binding; GO:0019899 enzyme binding; GO:0019900 kinase binding; GO:0019901 protein kinase binding; GO:0030276 clathrin binding;	PF00790; PF03127	VHS domain; GAT domain	U	KOG1087	Cytosolic sorting protein GGA2/TOM1
Q86TG7	567	K	3.171	0.0304464	Up	Retrotransposon-derived protein PEG10 OS=Homo sapiens OX=9606 GN=PEG10 PE=1 SV=2	PEG10	1	5.71722e-100	319.86	3	NVK(1)DGLITPTIAPNGAQVLQVK(1)R	2.1786	0.491		0.194	0.374	0.4	0.61	2.037	1.42	0.559		cytoplasm				GO:0000003 reproduction; GO:0001890 placenta development; GO:0003006 developmental process involved in reproduction; GO:0007275 multicellular organism development; GO:0009966 regulation of signal transduction; GO:0009968 negative regulation of signal transduction; GO:0010646 regulation of cell communication; GO:0010648 negative regulation of cell communication; GO:0017015 regulation of transformi…	GO:0005622 intracellular; GO:0005623 cell; GO:0005634 nucleus; GO:0005737 cytoplasm; GO:0005829 cytosol; GO:0043226 organelle; GO:0043227 membrane-bounded organelle; GO:0043229 intracellular organelle; GO:0043231 intracellular membrane-bounded organelle;		PF08284	Retroviral aspartyl protease
Q8N126	359	K	0.279	0.0170112	Down	Cell adhesion molecule 3 OS=Homo sapiens OX=9606 GN=CADM3 PE=1 SV=1	CADM3	1	0.000365641	112.93	2	HK(1)GTYLTHEAK	7.3065	1.929	1.101	1.592				0.519		0.341		extracellular	K06780	CADM3; cell adhesion molecule 3	hsa04514 Cell adhesion molecules	GO:0007155 cell adhesion; GO:0007156 homophilic cell adhesion via plasma membrane adhesion molecules; GO:0007157 heterophilic cell-cell adhesion via plasma membrane cell adhesion molecules; GO:0008037 cell recognition; GO:0008104 protein localization; GO:0009987 cellular process; GO:0016043 cellular component organization; GO:0022610 biological adhesion; GO:0033036 macromolecule localization; GO:…	GO:0005623 cell; GO:0005886 plasma membrane; GO:0005887 integral component of plasma membrane; GO:0005911 cell-cell junction; GO:0005912 adherens junction; GO:0016020 membrane; GO:0016021 integral component of membrane; GO:0030054 cell junction; GO:0031224 intrinsic component of membrane; GO:0031226 intrinsic component of plasma membrane; GO:0070161 anchoring junction; GO:0071944 cell periphery;	GO:0005102 signaling receptor binding; GO:0005488 binding; GO:0005515 protein binding; GO:0042802 identical protein binding; GO:0042803 protein homodimerization activity; GO:0046983 protein dimerization activity; GO:0050839 cell adhesion molecule binding;	PF07686; PF08205; PF13927	Immunoglobulin V-set domain; CD80-like C2-set immunoglobulin domain ; Immunoglobulin domain
Q8N1F7	644	K	0.442	0.0238337	Down	Nuclear pore complex protein Nup93 OS=Homo sapiens OX=9606 GN=NUP93 PE=1 SV=2	NUP93	1	4.2667e-10	88.252	3	VLELMNK(1)LLSPVVPQISAPQSNK	-0.63651	1.185		1.878	1.287			0.676	0.605			cytoplasm	K14309	NUP93; nuclear pore complex protein Nup93	hsa05014 Amyotrophic lateral sclerosis; hsa03013 RNA transport	GO:0001655 urogenital system development; GO:0001667 ameboidal-type cell migration; GO:0001822 kidney development; GO:0002064 epithelial cell development; GO:0006403 RNA localization; GO:0006405 RNA export from nucleus; GO:0006406 mRNA export from nucleus; GO:0006606 protein import into nucleus; GO:0006611 protein export from nucleus; GO:0006810 transport; GO:0006886 intracellular protein transpo…	GO:0005622 intracellular; GO:0005623 cell; GO:0005634 nucleus; GO:0005635 nuclear envelope; GO:0005643 nuclear pore; GO:0012505 endomembrane system; GO:0016020 membrane; GO:0031090 organelle membrane; GO:0031965 nuclear membrane; GO:0031967 organelle envelope; GO:0031974 membrane-enclosed lumen; GO:0031975 envelope; GO:0031981 nuclear lumen; GO:0032991 protein-containing complex; GO:0034399 nucle…	GO:0005198 structural molecule activity; GO:0017056 structural constituent of nuclear pore;			D	KOG2168	Cullins
Q8N4V2	293	K	4.394	0.0172756	Up	Synaptic vesicle 2-related protein OS=Homo sapiens OX=9606 GN=SVOP PE=1 SV=1	SVOP	1	0.000407572	70.552	3	IATENGAPMPLGK(1)LIISR	3.2568	0.289		0.549	0.63			2.364	1.936			plasma membrane					GO:0005622 intracellular; GO:0005623 cell; GO:0005737 cytoplasm; GO:0008021 synaptic vesicle; GO:0012505 endomembrane system; GO:0016020 membrane; GO:0016021 integral component of membrane; GO:0030133 transport vesicle; GO:0031224 intrinsic component of membrane; GO:0031410 cytoplasmic vesicle; GO:0031982 vesicle; GO:0043226 organelle; GO:0043227 membrane-bounded organelle; GO:0043229 intracellul…				S	KOG0255	Synaptic vesicle transporter SVOP and related transporters (major facilitator superfamily)
Q8WVC6	67	K	0.168	0.0373932	Down	Dephospho-CoA kinase domain-containing protein OS=Homo sapiens OX=9606 GN=DCAKD PE=1 SV=1	DCAKD	1	1.07094e-07	149.58	2	K(1)VLGDLIFNQPDR	1.2221	9.991	3.584	1.173	0.765	0.917	0.974	0.175	0.544	0.267	0.801	mitochondria				GO:0006139 nucleobase-containing compound metabolic process; GO:0006163 purine nucleotide metabolic process; GO:0006164 purine nucleotide biosynthetic process; GO:0006725 cellular aromatic compound metabolic process; GO:0006732 coenzyme metabolic process; GO:0006753 nucleoside phosphate metabolic process; GO:0006793 phosphorus metabolic process; GO:0006796 phosphate-containing compound metabolic …		GO:0003824 catalytic activity; GO:0004140 dephospho-CoA kinase activity; GO:0016301 kinase activity; GO:0016740 transferase activity; GO:0016772 transferase activity, transferring phosphorus-containing groups; GO:0016773 phosphotransferase activity, alcohol group as acceptor;	PF01121	Dephospho-CoA kinase	H	KOG3220	Similar to bacterial dephospho-CoA kinase
Q93008	112	K	0.551	0.023716	Down	Probable ubiquitin carboxyl-terminal hydrolase FAF-X OS=Homo sapiens OX=9606 GN=USP9X PE=1 SV=4	USP9X	1	4.20198e-10	171.34	2	GLDVK(1)SEACQR	-2.3982	1.778	0.976	1.321	0.998	1.027	0.371	0.617	1.057	0.89	0.424	plasma membrane	K11840			GO:0000003 reproduction; GO:0000122 negative regulation of transcription by RNA polymerase II; GO:0000902 cell morphogenesis; GO:0000904 cell morphogenesis involved in differentiation; GO:0001764 neuron migration; GO:0006355 regulation of transcription, DNA-templated; GO:0006357 regulation of transcription by RNA polymerase II; GO:0006464 cellular protein modification process; GO:0006508 proteoly…	GO:0005622 intracellular; GO:0005623 cell; GO:0005737 cytoplasm; GO:0005829 cytosol; GO:0030424 axon; GO:0030426 growth cone; GO:0030427 site of polarized growth; GO:0042995 cell projection; GO:0043005 neuron projection; GO:0120025 plasma membrane bounded cell projection; GO:0150034 distal axon;	GO:0003824 catalytic activity; GO:0004175 endopeptidase activity; GO:0004197 cysteine-type endopeptidase activity; GO:0005488 binding; GO:0005515 protein binding; GO:0008233 peptidase activity; GO:0008234 cysteine-type peptidase activity; GO:0016787 hydrolase activity; GO:0019783 ubiquitin-like protein-specific protease activity; GO:0036459 thiol-dependent ubiquitinyl hydrolase activity; GO:00463…			O	KOG1866	Ubiquitin carboxyl-terminal hydrolase
Q93009	355	K	0.379	0.017898	Down	Ubiquitin carboxyl-terminal hydrolase 7 OS=Homo sapiens OX=9606 GN=USP7 PE=1 SV=2	USP7	0.996154	4.52996e-41	257.66	2	EDYYDIQLSIK(0.996)GK(0.004)	-1.0739	1.95	1.464	1.602		0.771	0.277	0.683	1.033	0.474	0.275	nucleus	K11838	USP7; ubiquitin carboxyl-terminal hydrolase 7 [EC:3.4.19.12]	hsa05203 Viral carcinogenesis; hsa04068 FoxO signaling pathway; hsa05169 Epstein-Barr virus infection	GO:0006139 nucleobase-containing compound metabolic process; GO:0006259 DNA metabolic process; GO:0006281 DNA repair; GO:0006283 transcription-coupled nucleotide-excision repair; GO:0006289 nucleotide-excision repair; GO:0006325 chromatin organization; GO:0006355 regulation of transcription, DNA-templated; GO:0006464 cellular protein modification process; GO:0006508 proteolysis; GO:0006725 cellul…	GO:0000803 sex chromosome; GO:0001741 XY body; GO:0005622 intracellular; GO:0005623 cell; GO:0005634 nucleus; GO:0005654 nucleoplasm; GO:0005694 chromosome; GO:0005737 cytoplasm; GO:0005829 cytosol; GO:0031974 membrane-enclosed lumen; GO:0031981 nuclear lumen; GO:0032991 protein-containing complex; GO:0043226 organelle; GO:0043227 membrane-bounded organelle; GO:0043228 non-membrane-bounded organe…	GO:0002039 p53 binding; GO:0003824 catalytic activity; GO:0004175 endopeptidase activity; GO:0004197 cysteine-type endopeptidase activity; GO:0004843 thiol-dependent ubiquitin-specific protease activity; GO:0005488 binding; GO:0005515 protein binding; GO:0008022 protein C-terminus binding; GO:0008134 transcription factor binding; GO:0008233 peptidase activity; GO:0008234 cysteine-type peptidase a…	PF00917	MATH domain	O	KOG1863	Ubiquitin carboxyl-terminal hydrolase
Q93009	357	K	0.379	0.017898	Down	Ubiquitin carboxyl-terminal hydrolase 7 OS=Homo sapiens OX=9606 GN=USP7 PE=1 SV=2	USP7	0.97088	6.78011e-16	160.98	2	EDYYDIQLSIK(0.029)GK(0.971)	-2.7946	1.95	1.464	1.602		0.771	0.277	0.683	1.033	0.474	0.275	nucleus	K11838	USP7; ubiquitin carboxyl-terminal hydrolase 7 [EC:3.4.19.12]	hsa05203 Viral carcinogenesis; hsa04068 FoxO signaling pathway; hsa05169 Epstein-Barr virus infection	GO:0006139 nucleobase-containing compound metabolic process; GO:0006259 DNA metabolic process; GO:0006281 DNA repair; GO:0006283 transcription-coupled nucleotide-excision repair; GO:0006289 nucleotide-excision repair; GO:0006325 chromatin organization; GO:0006355 regulation of transcription, DNA-templated; GO:0006464 cellular protein modification process; GO:0006508 proteolysis; GO:0006725 cellul…	GO:0000803 sex chromosome; GO:0001741 XY body; GO:0005622 intracellular; GO:0005623 cell; GO:0005634 nucleus; GO:0005654 nucleoplasm; GO:0005694 chromosome; GO:0005737 cytoplasm; GO:0005829 cytosol; GO:0031974 membrane-enclosed lumen; GO:0031981 nuclear lumen; GO:0032991 protein-containing complex; GO:0043226 organelle; GO:0043227 membrane-bounded organelle; GO:0043228 non-membrane-bounded organe…	GO:0002039 p53 binding; GO:0003824 catalytic activity; GO:0004175 endopeptidase activity; GO:0004197 cysteine-type endopeptidase activity; GO:0004843 thiol-dependent ubiquitin-specific protease activity; GO:0005488 binding; GO:0005515 protein binding; GO:0008022 protein C-terminus binding; GO:0008134 transcription factor binding; GO:0008233 peptidase activity; GO:0008234 cysteine-type peptidase a…	PF00917	MATH domain	O	KOG1863	Ubiquitin carboxyl-terminal hydrolase
Q96CV9	448	K	0.228	0.00498798	Down	Optineurin OS=Homo sapiens OX=9606 GN=OPTN PE=1 SV=3	OPTN	0.999998	1.3689e-31	236.23	2	QLQMDEMK(1)QTIAK	-2.5492	1.303	2.767	0.84	1.924	3.038	0.747	0.213		0.547	0.296	cytoplasm	K19946	OPTN; optineurin	hsa04137 Mitophagy - animal; hsa05022 Pathways of neurodegeneration - multiple diseases; hsa05014 Amyotrophic lateral sclerosis	GO:0000086 G2/M transition of mitotic cell cycle; GO:0000278 mitotic cell cycle; GO:0000302 response to reactive oxygen species; GO:0001101 response to acid chemical; GO:0001654 eye development; GO:0001816 cytokine production; GO:0001817 regulation of cytokine production; GO:0001819 positive regulation of cytokine production; GO:0001919 regulation of receptor recycling; GO:0001920 negative regula…	GO:0000139 Golgi membrane; GO:0005622 intracellular; GO:0005623 cell; GO:0005634 nucleus; GO:0005654 nucleoplasm; GO:0005737 cytoplasm; GO:0005768 endosome; GO:0005773 vacuole; GO:0005776 autophagosome; GO:0005794 Golgi apparatus; GO:0005802 trans-Golgi network; GO:0005829 cytosol; GO:0010008 endosome membrane; GO:0012505 endomembrane system; GO:0016020 membrane; GO:0030424 axon; GO:0031090 organ…	GO:0001025 RNA polymerase III general transcription initiation factor binding; GO:0001155 TFIIIA-class transcription factor binding; GO:0005488 binding; GO:0005515 protein binding; GO:0008022 protein C-terminus binding; GO:0008134 transcription factor binding; GO:0017016 Ras GTPase binding; GO:0017137 Rab GTPase binding; GO:0019899 enzyme binding; GO:0030674 protein-macromolecule adaptor activity…
Q96J02	478	K	0.219	0.0300427	Down	E3 ubiquitin-protein ligase Itchy homolog OS=Homo sapiens OX=9606 GN=ITCH PE=1 SV=2	ITCH	1	1.19427e-05	110.14	3	SQGQLNEK(1)PLPEGWEMR	3.4284	4.446	0.799	0.775	0.879	0.863	0.092		0.827	0.349	0.091	cytoplasm	K05632	ITCH; E3 ubiquitin-protein ligase Itchy [EC:2.3.2.26]	hsa04932 Non-alcoholic fatty liver disease; hsa04668 TNF signaling pathway; hsa04120 Ubiquitin mediated proteolysis; hsa04144 Endocytosis	GO:0000209 protein polyubiquitination; GO:0001558 regulation of cell growth; GO:0001817 regulation of cytokine production; GO:0001818 negative regulation of cytokine production; GO:0001932 regulation of protein phosphorylation; GO:0001933 negative regulation of protein phosphorylation; GO:0002218 activation of innate immune response; GO:0002221 pattern recognition receptor signaling pathway; GO:0…	GO:0000151 ubiquitin ligase complex; GO:0005622 intracellular; GO:0005623 cell; GO:0005634 nucleus; GO:0005654 nucleoplasm; GO:0005737 cytoplasm; GO:0005829 cytosol; GO:0005886 plasma membrane; GO:0005938 cell cortex; GO:0016020 membrane; GO:0031410 cytoplasmic vesicle; GO:0031974 membrane-enclosed lumen; GO:0031981 nuclear lumen; GO:0031982 vesicle; GO:0032991 protein-containing complex; GO:0043…	GO:0001664 G protein-coupled receptor binding; GO:0003824 catalytic activity; GO:0004842 ubiquitin-protein transferase activity; GO:0005102 signaling receptor binding; GO:0005126 cytokine receptor binding; GO:0005488 binding; GO:0005515 protein binding; GO:0016740 transferase activity; GO:0016874 ligase activity; GO:0019787 ubiquitin-like protein transferase activity; GO:0019899 enzyme binding; G…	PF00168; PF00397; PF00632	C2 domain; WW domain; HECT-domain (ubiquitin-transferase)	O	KOG0940	Ubiquitin protein ligase RSP5/NEDD4
Q96J02	350	K	0.277	0.0100973	Down	E3 ubiquitin-protein ligase Itchy homolog OS=Homo sapiens OX=9606 GN=ITCH PE=1 SV=2	ITCH	1	2.85649e-22	206.38	2	VYYVDHVEK(1)R	-0.91541	4.125	0.955	1.018	0.85	1.359	0.567	0.711	0.257	0.454	0.314	cytoplasm	K05632	ITCH; E3 ubiquitin-protein ligase Itchy [EC:2.3.2.26]	hsa04932 Non-alcoholic fatty liver disease; hsa04668 TNF signaling pathway; hsa04120 Ubiquitin mediated proteolysis; hsa04144 Endocytosis	GO:0000209 protein polyubiquitination; GO:0001558 regulation of cell growth; GO:0001817 regulation of cytokine production; GO:0001818 negative regulation of cytokine production; GO:0001932 regulation of protein phosphorylation; GO:0001933 negative regulation of protein phosphorylation; GO:0002218 activation of innate immune response; GO:0002221 pattern recognition receptor signaling pathway; GO:0…	GO:0000151 ubiquitin ligase complex; GO:0005622 intracellular; GO:0005623 cell; GO:0005634 nucleus; GO:0005654 nucleoplasm; GO:0005737 cytoplasm; GO:0005829 cytosol; GO:0005886 plasma membrane; GO:0005938 cell cortex; GO:0016020 membrane; GO:0031410 cytoplasmic vesicle; GO:0031974 membrane-enclosed lumen; GO:0031981 nuclear lumen; GO:0031982 vesicle; GO:0032991 protein-containing complex; GO:0043…	GO:0001664 G protein-coupled receptor binding; GO:0003824 catalytic activity; GO:0004842 ubiquitin-protein transferase activity; GO:0005102 signaling receptor binding; GO:0005126 cytokine receptor binding; GO:0005488 binding; GO:0005515 protein binding; GO:0016740 transferase activity; GO:0016874 ligase activity; GO:0019787 ubiquitin-like protein transferase activity; GO:0019899 enzyme binding; G…	PF00168; PF00397; PF00632	C2 domain; WW domain; HECT-domain (ubiquitin-transferase)	O	KOG0940	Ubiquitin protein ligase RSP5/NEDD4
Q96PC5	703	K	0.275	0.0123617	Down	Melanoma inhibitory activity protein 2 OS=Homo sapiens OX=9606 GN=MIA2 PE=1 SV=4	MIA2	1	5.52723e-05	92.428	2	LLEK(1)FSLVQK	-5.0287		2.896	1.376		1.403		0.289	0.875	0.405	0.51	peroxisome	K23703			GO:0006810 transport; GO:0006886 intracellular protein transport; GO:0006888 endoplasmic reticulum to Golgi vesicle-mediated transport; GO:0008104 protein localization; GO:0009987 cellular process; GO:0015031 protein transport; GO:0015833 peptide transport; GO:0016043 cellular component organization; GO:0016192 vesicle-mediated transport; GO:0022607 cellular component assembly; GO:0032527 protein…	GO:0005622 intracellular; GO:0005623 cell; GO:0005737 cytoplasm; GO:0005783 endoplasmic reticulum; GO:0005789 endoplasmic reticulum membrane; GO:0012505 endomembrane system; GO:0016020 membrane; GO:0031984 organelle subcompartment; GO:0042175 nuclear outer membrane-endoplasmic reticulum membrane network; GO:0043226 organelle; GO:0043227 membrane-bounded organelle; GO:0043229 intracellular organel…	GO:0005215 transporter activity; GO:0008047 enzyme activator activity; GO:0030234 enzyme regulator activity; GO:0098772 molecular function regulator;	PF07653	Variant SH3 domain
Q96S55	464	K	0.169	0.0270848	Down	ATPase WRNIP1 OS=Homo sapiens OX=9606 GN=WRNIP1 PE=1 SV=2	WRNIP1	1	3.76332e-05	126.29	2	K(1)SGQSYSPSR	-1.0076	2.51	1.493	0.776			0.464	0.233		0.109		nucleus	K07478			GO:0000731 DNA synthesis involved in DNA repair; GO:0006139 nucleobase-containing compound metabolic process; GO:0006259 DNA metabolic process; GO:0006275 regulation of DNA replication; GO:0006281 DNA repair; GO:0006725 cellular aromatic compound metabolic process; GO:0006807 nitrogen compound metabolic process; GO:0006950 response to stress; GO:0006974 cellular response to DNA damage stimulus; G…	GO:0005622 intracellular; GO:0005623 cell; GO:0005634 nucleus; GO:0005737 cytoplasm; GO:0043226 organelle; GO:0043227 membrane-bounded organelle; GO:0043229 intracellular organelle; GO:0043231 intracellular membrane-bounded organelle; GO:0048471 perinuclear region of cytoplasm;	GO:0003824 catalytic activity; GO:0005488 binding; GO:0005515 protein binding; GO:0016462 pyrophosphatase activity; GO:0016787 hydrolase activity; GO:0016817 hydrolase activity, acting on acid anhydrides; GO:0016818 hydrolase activity, acting on acid anhydrides, in phosphorus-containing anhydrides; GO:0016887 ATPase activity; GO:0017111 nucleoside-triphosphatase activity; GO:0042802 identical pro…	PF00004; PF12002	ATPase family associated with various cellular activities (AAA); MgsA AAA+ ATPase C terminal	L	KOG2028	ATPase related to the helicase subunit of the Holliday junction resolvase
Q96S55	627	K	0.403	0.0420619	Down	ATPase WRNIP1 OS=Homo sapiens OX=9606 GN=WRNIP1 PE=1 SV=2	WRNIP1	0.999998	0.000530577	100.84	2	LMK(1)DLGYGK	-1.5468	2.697	1.46	1.361	0.504	1.025	0.472	0.56	1.023	0.23	0.558	nucleus	K07478			GO:0000731 DNA synthesis involved in DNA repair; GO:0006139 nucleobase-containing compound metabolic process; GO:0006259 DNA metabolic process; GO:0006275 regulation of DNA replication; GO:0006281 DNA repair; GO:0006725 cellular aromatic compound metabolic process; GO:0006807 nitrogen compound metabolic process; GO:0006950 response to stress; GO:0006974 cellular response to DNA damage stimulus; G…	GO:0005622 intracellular; GO:0005623 cell; GO:0005634 nucleus; GO:0005737 cytoplasm; GO:0043226 organelle; GO:0043227 membrane-bounded organelle; GO:0043229 intracellular organelle; GO:0043231 intracellular membrane-bounded organelle; GO:0048471 perinuclear region of cytoplasm;	GO:0003824 catalytic activity; GO:0005488 binding; GO:0005515 protein binding; GO:0016462 pyrophosphatase activity; GO:0016787 hydrolase activity; GO:0016817 hydrolase activity, acting on acid anhydrides; GO:0016818 hydrolase activity, acting on acid anhydrides, in phosphorus-containing anhydrides; GO:0016887 ATPase activity; GO:0017111 nucleoside-triphosphatase activity; GO:0042802 identical pro…	PF00004; PF12002	ATPase family associated with various cellular activities (AAA); MgsA AAA+ ATPase C terminal	L	KOG2028	ATPase related to the helicase subunit of the Holliday junction resolvase
Q96S55	286	K	0.352	0.00782393	Down	ATPase WRNIP1 OS=Homo sapiens OX=9606 GN=WRNIP1 PE=1 SV=2	WRNIP1	0.997631	5.91921e-41	257.66	2	TTLAHIIASNSK(0.998)K(0.002)	6.2433	2.105	1.994	1.201	0.626	1.149	0.639	0.473	0.585	0.23	0.562	nucleus	K07478			GO:0000731 DNA synthesis involved in DNA repair; GO:0006139 nucleobase-containing compound metabolic process; GO:0006259 DNA metabolic process; GO:0006275 regulation of DNA replication; GO:0006281 DNA repair; GO:0006725 cellular aromatic compound metabolic process; GO:0006807 nitrogen compound metabolic process; GO:0006950 response to stress; GO:0006974 cellular response to DNA damage stimulus; G…	GO:0005622 intracellular; GO:0005623 cell; GO:0005634 nucleus; GO:0005737 cytoplasm; GO:0043226 organelle; GO:0043227 membrane-bounded organelle; GO:0043229 intracellular organelle; GO:0043231 intracellular membrane-bounded organelle; GO:0048471 perinuclear region of cytoplasm;	GO:0003824 catalytic activity; GO:0005488 binding; GO:0005515 protein binding; GO:0016462 pyrophosphatase activity; GO:0016787 hydrolase activity; GO:0016817 hydrolase activity, acting on acid anhydrides; GO:0016818 hydrolase activity, acting on acid anhydrides, in phosphorus-containing anhydrides; GO:0016887 ATPase activity; GO:0017111 nucleoside-triphosphatase activity; GO:0042802 identical pro…	PF00004; PF12002	ATPase family associated with various cellular activities (AAA); MgsA AAA+ ATPase C terminal	L	KOG2028	ATPase related to the helicase subunit of the Holliday junction resolvase
Q99755	103	K	0.065	0.00855489	Down	Phosphatidylinositol 4-phosphate 5-kinase type-1 alpha OS=Homo sapiens OX=9606 GN=PIP5K1A PE=1 SV=1	PIP5K1A	1	1.71896e-41	248.41	3	GAIQLGITHTVGSLSTK(1)PER	-3.5768	5.544		1.412	0.568	2.812	0.158		0.16	0.184		nucleus	K00889	PIP5K; 1-phosphatidylinositol-4-phosphate 5-kinase [EC:2.7.1.68]	hsa04666 Fc gamma R-mediated phagocytosis; hsa04510 Focal adhesion; hsa04072 Phospholipase D signaling pathway; hsa04810 Regulation of actin cytoskeleton; hsa05231 Choline metabolism in cancer; hsa04070 Phosphatidylinositol signaling system; hsa00562 Inositol phosphate metabolism; hsa04144 Endocytosis; hsa01100 Metabolic pathways; hsa05135 Yersinia infection	GO:0001667 ameboidal-type cell migration; GO:0006629 lipid metabolic process; GO:0006644 phospholipid metabolic process; GO:0006650 glycerophospholipid metabolic process; GO:0006661 phosphatidylinositol biosynthetic process; GO:0006793 phosphorus metabolic process; GO:0006796 phosphate-containing compound metabolic process; GO:0006810 transport; GO:0006897 endocytosis; GO:0006909 phagocytosis; GO…	GO:0001726 ruffle; GO:0005622 intracellular; GO:0005623 cell; GO:0005634 nucleus; GO:0005654 nucleoplasm; GO:0005737 cytoplasm; GO:0005829 cytosol; GO:0005886 plasma membrane; GO:0016020 membrane; GO:0016604 nuclear body; GO:0016607 nuclear speck; GO:0030027 lamellipodium; GO:0031252 cell leading edge; GO:0031253 cell projection membrane; GO:0031256 leading edge membrane; GO:0031974 membrane-encl…	GO:0000285 1-phosphatidylinositol-3-phosphate 5-kinase activity; GO:0003824 catalytic activity; GO:0005488 binding; GO:0005515 protein binding; GO:0016301 kinase activity; GO:0016307 phosphatidylinositol phosphate kinase activity; GO:0016308 1-phosphatidylinositol-4-phosphate 5-kinase activity; GO:0016740 transferase activity; GO:0016772 transferase activity, transferring phosphorus-containing gr…			T	KOG0229	Phosphatidylinositol-4-phosphate 5-kinase
Q99808	239	K	0.444	0.00396371	Down	Equilibrative nucleoside transporter 1 OS=Homo sapiens OX=9606 GN=SLC29A1 PE=1 SV=3	SLC29A1	1	7.67772e-27	181.9	2	YYQQLK(1)LEGPGEQETK	0.38385	1.461	1.527	1.879	1.5	0.912	0.346	0.707	0.634	1.005	0.539	plasma membrane	K15014	SLC29A1_2_3; solute carrier family 29 (equilibrative nucleoside transporter), member 1/2/3	hsa05034 Alcoholism	GO:0001666 response to hypoxia; GO:0001678 cellular glucose homeostasis; GO:0003008 system process; GO:0006139 nucleobase-containing compound metabolic process; GO:0006725 cellular aromatic compound metabolic process; GO:0006807 nitrogen compound metabolic process; GO:0006810 transport; GO:0006950 response to stress; GO:0007154 cell communication; GO:0007165 signal transduction; GO:0007166 cell s…	GO:0005623 cell; GO:0005886 plasma membrane; GO:0005887 integral component of plasma membrane; GO:0016020 membrane; GO:0016021 integral component of membrane; GO:0016323 basolateral plasma membrane; GO:0016324 apical plasma membrane; GO:0031224 intrinsic component of membrane; GO:0031226 intrinsic component of plasma membrane; GO:0045177 apical part of cell; GO:0071944 cell periphery; GO:0098590 …	GO:0005215 transporter activity; GO:0005337 nucleoside transmembrane transporter activity; GO:0015932 nucleobase-containing compound transmembrane transporter activity; GO:0022857 transmembrane transporter activity; GO:1901505 carbohydrate derivative transmembrane transporter activity;			P	KOG1479	Nucleoside transporter
Q9BXJ9	665	K	0.487	0.022453	Down	N-alpha-acetyltransferase 15, NatA auxiliary subunit OS=Homo sapiens OX=9606 GN=NAA15 PE=1 SV=1	NAA15	0.974805	0.00865715	56.378	2	FLTPLK(0.975)NLVK(0.025)	0.33429	1.368		1.09			0.487		0.716	0.593		cytoplasm	K20792			GO:0006355 regulation of transcription, DNA-templated; GO:0006464 cellular protein modification process; GO:0006473 protein acetylation; GO:0006474 N-terminal protein amino acid acetylation; GO:0006807 nitrogen compound metabolic process; GO:0008152 metabolic process; GO:0009889 regulation of biosynthetic process; GO:0009891 positive regulation of biosynthetic process; GO:0009893 positive regulat…	GO:0005622 intracellular; GO:0005623 cell; GO:0005634 nucleus; GO:0005667 transcription regulator complex; GO:0005737 cytoplasm; GO:0005829 cytosol; GO:0031248 protein acetyltransferase complex; GO:0031414 N-terminal protein acetyltransferase complex; GO:0031415 NatA complex; GO:0032991 protein-containing complex; GO:0043226 organelle; GO:0043227 membrane-bounded organelle; GO:0043229 intracellul…	GO:0003824 catalytic activity; GO:0005488 binding; GO:0008080 N-acetyltransferase activity; GO:0016407 acetyltransferase activity; GO:0016410 N-acyltransferase activity; GO:0016740 transferase activity; GO:0016746 transferase activity, transferring acyl groups; GO:0016747 transferase activity, transferring acyl groups other than amino-acyl groups; GO:0043021 ribonucleoprotein complex binding; GO:…			B	KOG1156	N-terminal acetyltransferase
Q9H6X2	445	K	0.249	0.0150907	Down	Anthrax toxin receptor 1 OS=Homo sapiens OX=9606 GN=ANTXR1 PE=1 SV=2	ANTXR1	1	0.007106	79.809	2	K(1)WYSPIK	3.8998	1.322	0.82			1.629	0.287				0.338	plasma membrane	K20909	ANTXR; anthrax toxin receptor	hsa04621 NOD-like receptor signaling pathway	GO:0000003 reproduction; GO:0000902 cell morphogenesis; GO:0000904 cell morphogenesis involved in differentiation; GO:0001568 blood vessel development; GO:0001944 vasculature development; GO:0006996 organelle organization; GO:0007010 cytoskeleton organization; GO:0007154 cell communication; GO:0007155 cell adhesion; GO:0007165 signal transduction; GO:0007275 multicellular organism development; GO…	GO:0005622 intracellular; GO:0005623 cell; GO:0005737 cytoplasm; GO:0005768 endosome; GO:0005886 plasma membrane; GO:0009897 external side of plasma membrane; GO:0009986 cell surface; GO:0010008 endosome membrane; GO:0012505 endomembrane system; GO:0016020 membrane; GO:0030027 lamellipodium; GO:0030175 filopodium; GO:0031090 organelle membrane; GO:0031252 cell leading edge; GO:0031253 cell projec…	GO:0003779 actin binding; GO:0004888 transmembrane signaling receptor activity; GO:0005488 binding; GO:0005515 protein binding; GO:0005518 collagen binding; GO:0008092 cytoskeletal protein binding; GO:0038023 signaling receptor activity; GO:0044877 protein-containing complex binding; GO:0051015 actin filament binding; GO:0060089 molecular transducer activity;	PF00092; PF05587	von Willebrand factor type A domain; Anthrax receptor extracellular domain
Q9H8H3	210	K	0.288	0.0244014	Down	Methyltransferase-like protein 7A OS=Homo sapiens OX=9606 GN=METTL7A PE=1 SV=1	METTL7A	1	0.00558563	81.163	2	ESWK(1)ALER	-0.42107	1.282				1.159	0.419				0.284	extracellular				GO:0001775 cell activation; GO:0002252 immune effector process; GO:0002263 cell activation involved in immune response; GO:0002274 myeloid leukocyte activation; GO:0002275 myeloid cell activation involved in immune response; GO:0002283 neutrophil activation involved in immune response; GO:0002366 leukocyte activation involved in immune response; GO:0002376 immune system process; GO:0002443 leukoc…	GO:0005576 extracellular region; GO:0005622 intracellular; GO:0005623 cell; GO:0005737 cytoplasm; GO:0005811 lipid droplet; GO:0012505 endomembrane system; GO:0030141 secretory granule; GO:0031410 cytoplasmic vesicle; GO:0031974 membrane-enclosed lumen; GO:0031982 vesicle; GO:0043226 organelle; GO:0043227 membrane-bounded organelle; GO:0043228 non-membrane-bounded organelle; GO:0043229 intracellu…		PF08241	Methyltransferase domain	Q	KOG4300	Predicted methyltransferase
Q9NQX5	218	K	1.671	0.0359466	Up	Neural proliferation differentiation and control protein 1 OS=Homo sapiens OX=9606 GN=NPDC1 PE=1 SV=2	NPDC1	1	1.49271e-09	166.59	2	LTQK(1)ADYATAK(1)APGSPAAPR	-2.0165	1.013	0.652	0.761	0.823	0.898	2.146	0.868	1.207	1.72	0.987	plasma membrane				GO:0002682 regulation of immune system process; GO:0048583 regulation of response to stimulus; GO:0050776 regulation of immune response; GO:0050789 regulation of biological process; GO:0065007 biological regulation;	GO:0005623 cell; GO:0005886 plasma membrane; GO:0016020 membrane; GO:0071944 cell periphery;				T	KOG3884	Neural proliferation, differentiation and control protein
Q9NYM9	31	K	0.198	0.0357531	Down	BET1-like protein OS=Homo sapiens OX=9606 GN=BET1L PE=1 SV=1	BET1L	1	1.72013e-06	152.17	2	MADSLASK(1)VTR	-2.2142	2.493				2.011			0.314	0.577		cytoplasm	K08504	BET1; blocked early in transport 1	hsa04130 SNARE interactions in vesicular transport	GO:0006810 transport; GO:0006888 endoplasmic reticulum to Golgi vesicle-mediated transport; GO:0009987 cellular process; GO:0016043 cellular component organization; GO:0016192 vesicle-mediated transport; GO:0016197 endosomal transport; GO:0016482 cytosolic transport; GO:0032879 regulation of localization; GO:0042147 retrograde transport, endosome to Golgi; GO:0046907 intracellular transport; GO:0…	GO:0000139 Golgi membrane; GO:0005622 intracellular; GO:0005623 cell; GO:0005737 cytoplasm; GO:0005768 endosome; GO:0005794 Golgi apparatus; GO:0005795 Golgi stack; GO:0005802 trans-Golgi network; GO:0012505 endomembrane system; GO:0016020 membrane; GO:0016021 integral component of membrane; GO:0030173 integral component of Golgi membrane; GO:0031090 organelle membrane; GO:0031201 SNARE complex; …	GO:0005484 SNAP receptor activity; GO:0005488 binding; GO:0005515 protein binding;			U	KOG3385	V-SNARE
Q9NZ01	291	K	0.253	0.0133357	Down	Very-long-chain enoyl-CoA reductase OS=Homo sapiens OX=9606 GN=TECR PE=1 SV=1	TECR	1	0.00838652	105.04	2	SYLK(1)EFR	0.86251	2.821	0.579		1.365	1.279	0.345	0.419	0.526	0.237		cytoplasm	K10258	TER; very-long-chain enoyl-CoA reductase [EC:1.3.1.93]	hsa00062 Fatty acid elongation; hsa01040 Biosynthesis of unsaturated fatty acids; hsa01212 Fatty acid metabolism; hsa01100 Metabolic pathways	GO:0000038 very long-chain fatty acid metabolic process; GO:0006082 organic acid metabolic process; GO:0006139 nucleobase-containing compound metabolic process; GO:0006163 purine nucleotide metabolic process; GO:0006164 purine nucleotide biosynthetic process; GO:0006629 lipid metabolic process; GO:0006631 fatty acid metabolic process; GO:0006633 fatty acid biosynthetic process; GO:0006637 acyl-Co…	GO:0005622 intracellular; GO:0005623 cell; GO:0005737 cytoplasm; GO:0005783 endoplasmic reticulum; GO:0005789 endoplasmic reticulum membrane; GO:0012505 endomembrane system; GO:0016020 membrane; GO:0016021 integral component of membrane; GO:0030176 integral component of endoplasmic reticulum membrane; GO:0031224 intrinsic component of membrane; GO:0031227 intrinsic component of endoplasmic reticu…	GO:0003824 catalytic activity; GO:0003995 acyl-CoA dehydrogenase activity; GO:0004466 long-chain-acyl-CoA dehydrogenase activity; GO:0016491 oxidoreductase activity; GO:0016627 oxidoreductase activity, acting on the CH-CH group of donors; GO:0017099 very-long-chain-acyl-CoA dehydrogenase activity;			I	KOG1639	Steroid reductase required for elongation of the very long chain fatty acids
Q9UEU0	13	K	0.349	0.0191762	Down	Vesicle transport through interaction with t-SNAREs homolog 1B OS=Homo sapiens OX=9606 GN=VTI1B PE=1 SV=3	VTI1B	1	2.18282e-22	218.79	3	ASSAASSEHFEK(1)LHEIFR	2.7583	2.057	0.417	0.892	1.186	2.122	0.481	0.387	0.475	0.591	0.394	peroxisome	K08493	VTI1; vesicle transport through interaction with t-SNAREs 1	hsa04130 SNARE interactions in vesicular transport	GO:0002576 platelet degranulation; GO:0006605 protein targeting; GO:0006623 protein targeting to vacuole; GO:0006810 transport; GO:0006886 intracellular protein transport; GO:0006887 exocytosis; GO:0006888 endoplasmic reticulum to Golgi vesicle-mediated transport; GO:0006891 intra-Golgi vesicle-mediated transport; GO:0006892 post-Golgi vesicle-mediated transport; GO:0006896 Golgi to vacuole trans…	GO:0000323 lytic vacuole; GO:0005576 extracellular region; GO:0005622 intracellular; GO:0005623 cell; GO:0005737 cytoplasm; GO:0005764 lysosome; GO:0005765 lysosomal membrane; GO:0005768 endosome; GO:0005769 early endosome; GO:0005770 late endosome; GO:0005773 vacuole; GO:0005774 vacuolar membrane; GO:0005783 endoplasmic reticulum; GO:0005789 endoplasmic reticulum membrane; GO:0005794 Golgi appar…	GO:0000149 SNARE binding; GO:0005484 SNAP receptor activity; GO:0005488 binding; GO:0005515 protein binding; GO:0008200 ion channel inhibitor activity; GO:0016247 channel regulator activity; GO:0016248 channel inhibitor activity; GO:0017081 chloride channel regulator activity; GO:0019869 chloride channel inhibitor activity; GO:0098772 molecular function regulator; GO:0099106 ion channel regulator…	PF12352	Snare region anchored in the vesicle membrane C-terminus	U	KOG1666	V-SNARE
Q9UHD9	66	K	2.309	0.0444311	Up	Ubiquilin-2 OS=Homo sapiens OX=9606 GN=UBQLN2 PE=1 SV=2	UBQLN2	1	6.22836e-27	180.17	2	FK(1)SQTDQLVLIFAGK	-1.4131	0.606	0.21	0.713	0.791	0.734		1.313	1.901	1.017		cytoplasm,nucleus	K04523	UBQLN; ubiquilin	hsa05014 Amyotrophic lateral sclerosis; hsa04141 Protein processing in endoplasmic reticulum	GO:0002090 regulation of receptor internalization; GO:0002091 negative regulation of receptor internalization; GO:0006508 proteolysis; GO:0006511 ubiquitin-dependent protein catabolic process; GO:0006807 nitrogen compound metabolic process; GO:0006950 response to stress; GO:0008152 metabolic process; GO:0008277 regulation of G protein-coupled receptor signaling pathway; GO:0009056 catabolic proce…	GO:0005622 intracellular; GO:0005623 cell; GO:0005737 cytoplasm; GO:0005829 cytosol; GO:0005886 plasma membrane; GO:0016020 membrane; GO:0071944 cell periphery;		PF00240; PF00627	Ubiquitin family; UBA/TS-N domain	O	KOG0010	Ubiquitin-like protein
Q9UM54	1294	K	0.341	0.010637	Down	Unconventional myosin-VI OS=Homo sapiens OX=9606 GN=MYO6 PE=1 SV=4	MYO6	1	1.12104e-29	205.09	2	PTYATAMLQSLLK(1)	1.5469	2.628	0.957	1.594	1.777	0.856	0.367	0.421	0.985	0.361		cytoplasm	K10358	MYO6; myosin VI	hsa05132 Salmonella infection; hsa05130 Pathogenic Escherichia coli infection	GO:0002065 columnar/cuboidal epithelial cell differentiation; GO:0003008 system process; GO:0006355 regulation of transcription, DNA-templated; GO:0006357 regulation of transcription by RNA polymerase II; GO:0006605 protein targeting; GO:0006810 transport; GO:0006811 ion transport; GO:0006820 anion transport; GO:0006835 dicarboxylic acid transport; GO:0006865 amino acid transport; GO:0006886 intr…	GO:0000323 lytic vacuole; GO:0000428 DNA-directed RNA polymerase complex; GO:0001726 ruffle; GO:0005622 intracellular; GO:0005623 cell; GO:0005634 nucleus; GO:0005635 nuclear envelope; GO:0005654 nucleoplasm; GO:0005737 cytoplasm; GO:0005764 lysosome; GO:0005765 lysosomal membrane; GO:0005773 vacuole; GO:0005774 vacuolar membrane; GO:0005794 Golgi apparatus; GO:0005829 cytosol; GO:0005856 cytoske…	GO:0000146 microfilament motor activity; GO:0000166 nucleotide binding; GO:0003774 motor activity; GO:0003779 actin binding; GO:0003824 catalytic activity; GO:0005488 binding; GO:0005515 protein binding; GO:0005516 calmodulin binding; GO:0008092 cytoskeletal protein binding; GO:0016462 pyrophosphatase activity; GO:0016787 hydrolase activity; GO:0016817 hydrolase activity, acting on acid anhydride…	PF00063	Myosin head (motor domain)	Z	KOG0163	Myosin class VI heavy chain
Q9UMS4	244	K	0.582	0.0322422	Down	Pre-mRNA-processing factor 19 OS=Homo sapiens OX=9606 GN=PRPF19 PE=1 SV=1	PRPF19	1	1.05169e-06	135.13	2	ILTGGADK(1)NVVVFDK	-1.6214	1.106	1.092	1.47	1			0.553		0.805		cytoplasm	K10599	PRPF19; pre-mRNA-processing factor 19 [EC:2.3.2.27]	hsa03040 Spliceosome; hsa04120 Ubiquitin mediated proteolysis	GO:0000075 cell cycle checkpoint; GO:0000077 DNA damage checkpoint; GO:0000209 protein polyubiquitination; GO:0000244 spliceosomal tri-snRNP complex assembly; GO:0000245 spliceosomal complex assembly; GO:0000349 generation of catalytic spliceosome for first transesterification step; GO:0000375 RNA splicing, via transesterification reactions; GO:0000377 RNA splicing, via transesterification reacti…	GO:0000974 Prp19 complex; GO:0005622 intracellular; GO:0005623 cell; GO:0005634 nucleus; GO:0005654 nucleoplasm; GO:0005681 spliceosomal complex; GO:0005684 U2-type spliceosomal complex; GO:0005694 chromosome; GO:0005737 cytoplasm; GO:0005811 lipid droplet; GO:0016604 nuclear body; GO:0016607 nuclear speck; GO:0031974 membrane-enclosed lumen; GO:0031981 nuclear lumen; GO:0032991 protein-containin…	GO:0003824 catalytic activity; GO:0004842 ubiquitin-protein transferase activity; GO:0005488 binding; GO:0005515 protein binding; GO:0016740 transferase activity; GO:0019787 ubiquitin-like protein transferase activity; GO:0034450 ubiquitin-ubiquitin ligase activity; GO:0042802 identical protein binding; GO:0061630 ubiquitin protein ligase activity; GO:0061659 ubiquitin-like protein ligase activit…	PF04564; PF08606	U-box domain; Prp19/Pso4-like	S	KOG0289	mRNA splicing factor
Q9UPU5	648	K	0.271	0.0151612	Down	Ubiquitin carboxyl-terminal hydrolase 24 OS=Homo sapiens OX=9606 GN=USP24 PE=1 SV=3	USP24	1	2.74282e-09	162.49	2	SFIK(1)QTYQK	-0.72721	2.999	0.539	1.493	0.568	1.3	0.185	0.241	0.517	0.408	0.517	cytoplasm	K11840			GO:0006464 cellular protein modification process; GO:0006508 proteolysis; GO:0006807 nitrogen compound metabolic process; GO:0008152 metabolic process; GO:0009987 cellular process; GO:0016579 protein deubiquitination; GO:0019538 protein metabolic process; GO:0036211 protein modification process; GO:0043170 macromolecule metabolic process; GO:0043412 macromolecule modification; GO:0044237 cellular…	GO:0005622 intracellular; GO:0005623 cell; GO:0005634 nucleus; GO:0005654 nucleoplasm; GO:0031974 membrane-enclosed lumen; GO:0031981 nuclear lumen; GO:0043226 organelle; GO:0043227 membrane-bounded organelle; GO:0043229 intracellular organelle; GO:0043231 intracellular membrane-bounded organelle; GO:0043233 organelle lumen; GO:0070013 intracellular organelle lumen;	GO:0003824 catalytic activity; GO:0008233 peptidase activity; GO:0008234 cysteine-type peptidase activity; GO:0016787 hydrolase activity; GO:0019783 ubiquitin-like protein-specific protease activity; GO:0036459 thiol-dependent ubiquitinyl hydrolase activity; GO:0070011 peptidase activity, acting on L-amino acid peptides; GO:0101005 ubiquitinyl hydrolase activity; GO:0140096 catalytic activity, ac…			O	KOG1866	Ubiquitin carboxyl-terminal hydrolase
Q9Y282	8	K	0.246	0.0126472	Down	Endoplasmic reticulum-Golgi intermediate compartment protein 3 OS=Homo sapiens OX=9606 GN=ERGIC3 PE=1 SV=1	ERGIC3	1	0.000971495	81.163	2	LK(1)QFDAYPK	0.33657	3.326	0.859	1.163		0.796		0.489	0.417	0.329	0.275	plasma membrane	K20367			GO:0006810 transport; GO:0006888 endoplasmic reticulum to Golgi vesicle-mediated transport; GO:0016192 vesicle-mediated transport; GO:0046907 intracellular transport; GO:0048193 Golgi vesicle transport; GO:0051179 localization; GO:0051234 establishment of localization; GO:0051641 cellular localization; GO:0051649 establishment of localization in cell;	GO:0005622 intracellular; GO:0005623 cell; GO:0005737 cytoplasm; GO:0005793 endoplasmic reticulum-Golgi intermediate compartment; GO:0043226 organelle; GO:0043227 membrane-bounded organelle; GO:0043229 intracellular organelle; GO:0043231 intracellular membrane-bounded organelle;		PF13850	Endoplasmic Reticulum-Golgi Intermediate Compartment (ERGIC)	U	KOG2667	COPII vesicle protein
Q9Y4C2	750	K	0.274	0.0392669	Down	TRPM8 channel-associated factor 1 OS=Homo sapiens OX=9606 GN=TCAF1 PE=1 SV=3	TCAF1	1	0.000281028	106.47	2	TK(1)GLWGPVHELGR	-0.37706		1.095	1.763				0.351		0.432		cytoplasm,nucleus				GO:0010359 regulation of anion channel activity; GO:0022898 regulation of transmembrane transporter activity; GO:0030334 regulation of cell migration; GO:0030336 negative regulation of cell migration; GO:0032386 regulation of intracellular transport; GO:0032388 positive regulation of intracellular transport; GO:0032409 regulation of transporter activity; GO:0032411 positive regulation of transpor…	GO:0005623 cell; GO:0005886 plasma membrane; GO:0016020 membrane; GO:0071944 cell periphery;	GO:0005488 binding; GO:0005515 protein binding; GO:0044325 ion channel binding;	PF13402	Peptidase M60-like family
Q9Y5K5	154	K	0.446	0.0173131	Down	Ubiquitin carboxyl-terminal hydrolase isozyme L5 OS=Homo sapiens OX=9606 GN=UCHL5 PE=1 SV=3	UCHL5	0.998804	1.15716e-07	122.51	2	QQMFEFDTK(0.999)TSAK(0.001)	-1.8923	1.564		1.321				0.496	0.732	0.701		cytoplasm	K05610			GO:0006464 cellular protein modification process; GO:0006508 proteolysis; GO:0006807 nitrogen compound metabolic process; GO:0008152 metabolic process; GO:0009892 negative regulation of metabolic process; GO:0009894 regulation of catabolic process; GO:0009987 cellular process; GO:0010466 negative regulation of peptidase activity; GO:0010605 negative regulation of macromolecule metabolic process; …	GO:0000228 nuclear chromosome; GO:0000785 chromatin; GO:0000790 nuclear chromatin; GO:0005622 intracellular; GO:0005623 cell; GO:0005634 nucleus; GO:0005654 nucleoplasm; GO:0005694 chromosome; GO:0005737 cytoplasm; GO:0005739 mitochondrion; GO:0005829 cytosol; GO:0031011 Ino80 complex; GO:0031974 membrane-enclosed lumen; GO:0031981 nuclear lumen; GO:0032991 protein-containing complex; GO:0033202 …	GO:0003824 catalytic activity; GO:0004843 thiol-dependent ubiquitin-specific protease activity; GO:0004857 enzyme inhibitor activity; GO:0004866 endopeptidase inhibitor activity; GO:0005488 binding; GO:0008233 peptidase activity; GO:0008234 cysteine-type peptidase activity; GO:0016787 hydrolase activity; GO:0019783 ubiquitin-like protein-specific protease activity; GO:0030234 enzyme regulator act…	PF01088	Ubiquitin carboxyl-terminal hydrolase, family 1	L	KOG2778	Ubiquitin C-terminal hydrolase
Q9Y6Y8	477	K	0.595	0.0318229	Down	SEC23-interacting protein OS=Homo sapiens OX=9606 GN=SEC23IP PE=1 SV=1	SEC23IP	1	0.00406419	100.75	2	VVSLK(1)LLR	-2.1124	1.323	0.884	0.989				0.772	0.554	0.575		nucleus				GO:0000003 reproduction; GO:0001675 acrosome assembly; GO:0003006 developmental process involved in reproduction; GO:0006810 transport; GO:0006886 intracellular protein transport; GO:0006888 endoplasmic reticulum to Golgi vesicle-mediated transport; GO:0006900 vesicle budding from membrane; GO:0006901 vesicle coating; GO:0006903 vesicle targeting; GO:0006996 organelle organization; GO:0007030 Gol…	GO:0005622 intracellular; GO:0005623 cell; GO:0005737 cytoplasm; GO:0005783 endoplasmic reticulum; GO:0005793 endoplasmic reticulum-Golgi intermediate compartment; GO:0005794 Golgi apparatus; GO:0005798 Golgi-associated vesicle; GO:0005801 cis-Golgi network; GO:0005829 cytosol; GO:0012505 endomembrane system; GO:0030134 COPII-coated ER to Golgi transport vesicle; GO:0030135 coated vesicle; GO:003…	GO:0003824 catalytic activity; GO:0004620 phospholipase activity; GO:0016298 lipase activity; GO:0016787 hydrolase activity; GO:0016788 hydrolase activity, acting on ester bonds;	PF00536	SAM domain (Sterile alpha motif)	U	KOG2308	Phosphatidic acid-preferring phospholipase A1, contains DDHD domain
